# Supplementary material for: Artificial shelters and marine infectious disease: no detectable effect of the use of casitas to enhance juvenile Panulirus argus in shelter-poor habitats on a viral disease dynamics
Source: PeerJ. 2023 Mar 20;11:e15073. doi: 10.7717/peerj.15073 (PMC10035424; doi:10.7717/peerj.15073)
Supplement: Supplemental Information 1 — Data on sex, size and health condition of lobsters sampled from crevices on control sites during Experimental stage A and from casitas and crevices on casita sites during Esperimental stages A and B. [file peerj-11-15073-s001.xlsx]

## Sheet: Glossary
Data on Panulirus argus juvenile lobsters on experimental sites, Puerto Morelos reef lagoon, Quintana Roo, Mexico
Casita sites (Sites 2, 4, 5, 7, 8) had 10 casitas each (Durock plate 1.2 * 1 m, 4 mm PVC pipes)
Control sites (sites 1, 3, 6, 9, 10) had no casitas.
All sites measures 1 ha and had some pre-existing crevice shelters (crevices, coral heads, soft corals, sponges, holes, etc.)
Stage A: 10 sampling dates, from November 2009 to April 2012
Stage B: 8 sampling dates, from September 2012 to January 2015
Sampling date	dd/mmm/yy
Site No.	1 to 10
No. of casita or line	Casitas: C1 to C10 on each casita site; Lines: denotes the location of a pre-existing crevice shelter in a 10 lines x 10 lines square within the 1 ha site.
Crevice size	1: small (<25 cm largest external diameter); 2: medium (25-50 cm); 3: large (>50 cm)
Lobster sex:	M: male; H: female, U: undetermined
Lobster size:	Carapace length (mm)
Condition:	S: Healthy; E: diseased

## Sheet: Casita sites StagesA-B
Sampling date	Site No.	No. of casita or line	Crevice size	Lobster sex	Lobster size	Condition
2009-11-17	2	1.52	2	M	15.2	S
2009-11-17	2	2.51	2	M	10.6	S
2009-11-17	2	2.52	1	M	16.1	S
2009-11-17	2	2.53	2	M	13.2	S
2009-11-17	2	C1		H	28.5	E
2009-11-17	2	C1		M	18.7	S
2009-11-17	2	3.1	2	M	15.4	S
2009-11-17	2	C2		H	36.7	S
2009-11-17	2	C2		M	37.6	E
2009-11-17	2	3.22	1	M	13	S
2009-11-17	2	C3		M	10.6	S
2009-11-17	2	C3		M	46.5	S
2009-11-17	2	C3		M	27	S
2009-11-17	2	C3		M	45.4	S
2009-11-17	2	C3		M	43.3	S
2009-11-17	2	C3		M	37.2	S
2009-11-17	2	C3		M	31.2	E
2009-11-17	2	C3		M	43.2	S
2009-11-17	2	C3		H	28.4	S
2009-11-17	2	C3		M	55.2	S
2009-11-17	2	C3		M	39.7	S
2009-11-17	2	C3		M	42.1	S
2009-11-17	2	C3		M	33.7	S
2009-11-17	2	C3		M	48.5	S
2009-11-17	2	C3		M	41.3	S
2009-11-17	2	C3		H	33.4	S
2009-11-17	2	C3		M	52	S
2009-11-17	2	C3		M	48	S
2009-11-17	2	C3		H	39.7	S
2009-11-17	2	C3		M	39.5	S
2009-11-17	2	C3		H	42	S
2009-11-17	2	C3		M	46.7	S
2009-11-17	2	C3		H	39.3	S
2009-11-17	2	C3		H	37.8	S
2009-11-17	2	C3		M	39.8	S
2009-11-17	2	C3		M	38.6	S
2009-11-17	2	C3		H	12.5	E
2009-11-17	2	C3		M	33.4	S
2009-11-17	2	C3		M	41.6	S
2009-11-17	2	C3		M	42.5	S
2009-11-17	2	C3		M	39.4	S
2009-11-17	2	C3		M	27.3	S
2009-11-17	2	C3		M	36	S
2009-11-17	2	C3		H	44.3	S
2009-11-17	2	C3		H	36.4	S
2009-11-17	2	C3		H	28.7	S
2009-11-17	2	C3		M	35	S
2009-11-17	2	C3		H	42	S
2009-11-17	2	C3		H	32	S
2009-11-17	2	C3		M	20.5	S
2009-11-17	2	C3		H	37	S
2009-11-17	2	C3		H	36.8	S
2009-11-17	2	C3		M	35	S
2009-11-17	2	C3		H	28.7	S
2009-11-17	2	C3		H	21.6	S
2009-11-17	2	C3		M	18	S
2009-11-17	2	C3		M	31.6	S
2009-11-17	2	C3		M	24.3	S
2009-11-17	2	C3		M	23.6	S
2009-11-17	2	C3		H	21.3	S
2009-11-17	2	C3		M	28.4	S
2009-11-17	2	C3		M	16	S
2009-11-17	2	C3		M	25.4	S
2009-11-17	2	4.41	2	U	9	S
2009-11-17	2	4.41	2	U	9.7	S
2009-11-17	2	C4		M	18	S
2009-11-17	2	C4		H	34.4	S
2009-11-17	2	C4		M	19	S
2009-11-17	2	C4		H	23.4	S
2009-11-17	2	C4		M	19.2	S
2009-11-17	2	C4		M	24.9	S
2009-11-17	2	C4		H	21.6	S
2009-11-17	2	C4		H	34	S
2009-11-17	2	C4		H	23.8	S
2009-11-17	2	C4		M	27.3	S
2009-11-17	2	C4		H	41	S
2009-11-17	2	C4		M	17.8	S
2009-11-17	2	C4		M	53	S
2009-11-17	2	C4		M	27	S
2009-11-17	2	C4		M	20.5	S
2009-11-17	2	C4		H	26.6	S
2009-11-17	2	C4		H	28.3	S
2009-11-17	2	C4		H	38.4	S
2009-11-17	2	C4		H	25.7	S
2009-11-17	2	C4		M	35	S
2009-11-17	2	C4		H	18.3	S
2009-11-17	2	C4		M	37	S
2009-11-17	2	C4		H	24	S
2009-11-17	2	4.21	3	M	19.5	S
2009-11-17	2	C5		M	27	S
2009-11-17	2	C5		H	31.6	S
2009-11-17	2	C5		H	33.4	S
2009-11-17	2	C5		M	27	S
2009-11-17	2	C5		H	25.7	S
2009-11-17	2	C5		M	27	S
2009-11-17	2	C5		H	31.6	S
2009-11-17	2	C5		H	33.4	S
2009-11-17	2	C5		M	27	S
2009-11-17	2	C5		H	25.7	S
2009-11-17	2	5.4	2	M	15	S
2009-11-17	2	C6		M	39.5	S
2009-11-17	2	C6		H	40.3	S
2009-11-17	2	C6		M	17.8	S
2009-11-17	2	C6		H	21.7	S
2009-11-17	2	C6		H	41.2	S
2009-11-17	2	C6		M	32.3	S
2009-11-17	2	C6		M	37.2	S
2009-11-17	2	C6		M	14	S
2009-11-17	2	C6		M	47.6	S
2009-11-17	2	C6		M	52	E
2009-11-17	2	C6		H	32.3	S
2009-11-17	2	C7		M	24	S
2009-11-17	2	C7		H	48.5	S
2009-11-17	2	C7		H	42.7	S
2009-11-17	2	C7		M	55	S
2009-11-17	2	C7		H	53.4	S
2009-11-17	2	C7		M	30.3	S
2009-11-17	2	C7		H	35.2	S
2009-11-17	2	C7		H	32	S
2009-11-17	2	C7		M	68	S
2009-11-17	2	C7		M	62.8	S
2009-11-17	2	C7		M	48	S
2009-11-17	2	C7		M	43.5	S
2009-11-17	2	C7		M	49	S
2009-11-17	2	C7		M	44	S
2009-11-17	2	C7		M	39.2	S
2009-11-17	2	C7		M	43.2	S
2009-11-17	2	C7		H	40.7	S
2009-11-17	2	C7		H	69.4	S
2009-11-17	2	C7		M	38	S
2009-11-17	2	C7		H	39	S
2009-11-17	2	C7		M	16.8	S
2009-11-17	2	C7		M	22	E
2009-11-17	2	C7		H	41	S
2009-11-17	2	C7		H	58.7	S
2009-11-17	2	C7		H	29.4	S
2009-11-17	2	C7		M	43	S
2009-11-17	2	C7		M	33.2	S
2009-11-17	2	C7		H	39	S
2009-11-17	2	C7		H	18.3	S
2009-11-17	2	C7		M	36.4	S
2009-11-17	2	C7		H	41.5	S
2009-11-17	2	C7		M	36	S
2009-11-17	2	C7		H	33	S
2009-11-17	2	C7		M	31.5	S
2009-11-17	2	C7		M	28.7	S
2009-11-17	2	C7		H	45	S
2009-11-17	2	C7		H	37.4	S
2009-11-17	2	C7		H	48	S
2009-11-17	2	C7		H	36	S
2009-11-17	2	C7		H	28.2	S
2009-11-17	2	C7		M	36.7	S
2009-11-17	2	C7		H	36	S
2009-11-17	2	C7		H	20.7	S
2009-11-17	2	C7		M	37	S
2009-11-17	2	C7		H	24.6	S
2009-11-17	2	9.2	2	M	18.3	S
2009-11-17	2	C9		H	18	S
2009-11-17	2	C9		H	18.9	S
2009-11-17	2	C9		H	41.4	S
2009-11-17	2	C10		M	17.8	S
2009-11-17	2	C10		M	27.2	S
2009-11-17	2	C10		M	29	S
2009-11-17	2	C10		H	18	S
2009-11-17	2	C10		M	16	S
2009-11-17	2	C10		M	17.5	S
2009-11-17	2	C10		M	19	E
2009-11-17	2	C10		M	19	S
2009-11-17	2	C10		H	36.1	S
2009-11-17	2	C10		H	22.4	S
2009-11-17	2	C10		M	23	S
2009-11-17	2	C10		H	26.5	S
2009-11-17	2	C10		M	37.5	S
2010-03-19	2	C1		M	34	E
2010-03-19	2	1.52	2	H	21.3	S
2010-03-19	2	C2		H	45	E
2010-03-19	2	3.2	3	H	56.1	S
2010-03-19	2	C4		M	36	S
2010-03-19	2	C4		H	45.7	S
2010-03-19	2	C4		M	48.6	S
2010-03-19	2	C4		H	56.2	S
2010-03-19	2	C4		M	25.6	S
2010-03-19	2	C4		H	42.6	S
2010-03-19	2	C4		H	51.4	S
2010-03-19	2	3.43	1	M	19.5	S
2010-03-19	2	C3		H	24.5	E
2010-03-19	2	C3		M	41	S
2010-03-19	2	C3		H	35.9	S
2010-03-19	2	C3		H	46.5	S
2010-03-19	2	C3		M	23	E
2010-03-19	2	C3		M	26	E
2010-03-19	2	C3		H	37.8	S
2010-03-19	2	C3		M	38	S
2010-03-19	2	C3		M	45	S
2010-03-19	2	C3		M	28.8	S
2010-03-19	2	C3		M	53.1	S
2010-03-19	2	C3		H	33.1	E
2010-03-19	2	C3		H	44	S
2010-03-19	2	C5		M	26.5	S
2010-03-19	2	C5		H	45	S
2010-03-19	2	C5		H	30	S
2010-03-19	2	C5		H	45.4	S
2010-03-19	2	C5		M	36.4	S
2010-03-19	2	C5		M	50	E
2010-03-19	2	C5		M	45	S
2010-03-19	2	C5		H	31.6	S
2010-03-19	2	C5		M	46.7	E
2010-03-19	2	C5		M	59	S
2010-03-19	2	C5		M	53	S
2010-03-19	2	C5		H	54.5	S
2010-03-19	2	C5		M	42	S
2010-03-19	2	C5		M	33.8	S
2010-03-19	2		2	H	38.3	S
2010-03-19	2	C7		H	49	S
2010-03-19	2	C7		H	46.2	S
2010-03-19	2	C7		M	33.5	S
2010-03-19	2	C7		H	37.6	S
2010-03-19	2	C7		M	30.4	S
2010-03-19	2	C7		M	45.7	S
2010-03-19	2	C7		M	58	S
2010-03-19	2	C7		H	47.6	S
2010-03-19	2	C7		M	40	S
2010-03-19	2	C7		H	35	S
2010-03-19	2	C7		M	43	S
2010-03-19	2	C7		M	45.7	S
2010-03-19	2	C7		H	33.6	S
2010-03-19	2	C7		H	38	S
2010-03-19	2	C7		H	37	S
2010-03-19	2	C7		M	45.6	E
2010-03-19	2	C7		H	46	E
2010-03-19	2	C7		M	61	S
2010-03-19	2	C7		M	59.1	E
2010-03-19	2	C7		M	49	S
2010-03-19	2	C7		H	34.5	S
2010-03-19	2	C7		M	49	S
2010-03-19	2	C7		M	48.4	S
2010-03-19	2	C7		M	35	S
2010-03-19	2	C7		H	55.4	S
2010-03-19	2	C7		H	60.3	S
2010-03-19	2	C7		M	51.2	S
2010-03-19	2	C7		M	38	S
2010-03-19	2	C6		H	47.6	S
2010-03-19	2	C6		H	48.2	S
2010-03-19	2	C6		H	49	S
2010-03-19	2	C6		H	32.2	S
2010-03-19	2	C6		M	38.9	S
2010-03-19	2	C6		M	26.9	S
2010-03-19	2	C6		M	32.3	S
2010-03-19	2	C6		H	36.4	S
2010-03-19	2	C6		H	43.7	S
2010-03-19	2	C6		H	30.1	E
2010-03-19	2	C6		M	28.6	S
2010-03-19	2	C6		M	36	S
2010-03-19	2	C6		M	40	S
2010-03-19	2	C6		M	34.5	S
2010-03-19	2	C6		M	34.6	S
2010-03-19	2	C6		M	45.6	S
2010-03-19	2	C6		H	41.6	S
2010-03-19	2	C6		H	28	S
2010-03-19	2	C6		H	34	S
2010-03-19	2	C6		M	20	S
2010-03-19	2	C6		U	35	S
2010-03-19	2	C6		M	33.4	S
2010-03-19	2	C6		H	49.7	S
2010-03-19	2	C10		H	45.8	S
2010-03-19	2	C10		H	40	E
2010-03-19	2	C10		M	18.2	S
2010-03-19	2	C10		H	38.1	S
2010-03-19	2	C10		H	29.3	S
2010-03-19	2	C10		M	33	S
2010-03-19	2	C10		M	42.4	S
2010-03-19	2	C10		M	34.6	S
2010-03-19	2	C10		M	32.3	S
2010-03-19	2	C10		M	40.3	E
2010-03-19	2	C10		H	35.4	S
2010-03-19	2	C10		M	23.2	S
2010-03-19	2	C10		H	24.5	S
2010-03-19	2	C10		H	59	S
2010-03-19	2	C10		H	28	E
2010-03-19	2	C10		H	28	S
2010-03-19	2	C10		M	46	S
2010-03-19	2	C10		M	31.8	S
2010-03-19	2	C10		H	28.6	S
2010-03-19	2	C10		M	27.2	S
2010-03-19	2	C10		H	24.3	S
2010-03-19	2	C10		H	47.2	S
2010-03-19	2	C10		H	29.5	S
2010-03-19	2	C10		H	24.5	S
2010-03-19	2	C10		M	30	S
2010-03-19	2	C10		H	27.4	S
2010-03-19	2	C10		M	37	S
2010-03-19	2	C10		M	19	S
2010-03-19	2	C10		M	40.5	S
2010-03-19	2	C10		M	48	S
2010-03-19	2	C10		H	35	E
2010-03-19	2	C8		H	41.4	E
2010-03-19	2	C8		M	58.8	S
2010-03-19	2	C8		M	52.8	S
2010-03-19	2	C8		M	16.3	E
2010-03-19	2	C8		M	37.2	S
2010-03-19	2	C8		M	27.6	S
2010-03-19	2	C8		H	49.6	S
2010-03-19	2	C9		H	51	E
2010-03-19	2	C9		M	38.4	S
2010-06-14	2	C1		M	39	E
2010-06-14	2	C1		M	32.1	E
2010-06-14	2	2.6	3	M	21.5	S
2010-06-14	2	C2		M	21	S
2010-06-14	2	C2		M	63.2	S
2010-06-14	2	C2		M	14.2	E
2010-06-14	2	C2		H	36.3	E
2010-06-14	2	C2		H	44.5	E
2010-06-14	2	C2		M	42.3	S
2010-06-14	2	C4		M	40.4	E
2010-06-14	2	C3		H	42	S
2010-06-14	2	C3		H	38	S
2010-06-14	2	C3		H	48.5	S
2010-06-14	2	C3		H	43.4	S
2010-06-14	2	C5		H	49.6	E
2010-06-14	2	C5		H	38.4	E
2010-06-14	2	C6		M	45.7	S
2010-06-14	2	C6		M	39.8	S
2010-06-14	2	C7		M	29.9	S
2010-06-14	2	C7		M	54.6	S
2010-06-14	2	C7		H	40.8	S
2010-06-14	2	C7		M	43.3	S
2010-06-14	2	C7		M	36	S
2010-06-14	2	C7		M	46.7	S
2010-06-14	2	C9		H	23.6	S
2010-06-14	2	C9		M	28.3	S
2010-06-14	2	C9		M	32	S
2010-06-14	2	C9		H	48.3	S
2010-06-14	2	C8		M	14.8	E
2010-06-14	2	C8		H	51.3	S
2010-06-14	2	C8		H	40.5	S
2010-06-14	2	C8		H	42.7	S
2010-06-14	2	C8		H	20	S
2010-06-14	2	C10		H	37.4	E
2010-09-03	2	1.5	1	M	16.5	S
2010-09-03	2	C1		M	25	E
2010-09-03	2	C2		M	20.5	S
2010-09-03	2	C2		H	41	S
2010-09-03	2	C2		M	35.7	S
2010-09-03	2	C2		H	21.5	S
2010-09-03	2	2.21	3	H	17	S
2010-09-03	2	2.21	3	M	19.7	S
2010-09-03	2	2.21	3	H	22.7	S
2010-09-03	2	2.21	3	H	22.3	S
2010-09-03	2	C3		M	24	S
2010-09-03	2	C3		H	30	S
2010-09-03	2	C5		M	14.5	E
2010-09-03	2	C5		M	15.3	S
2010-09-03	2	C5		H	16.3	E
2010-09-03	2	C5		M	17.9	S
2010-09-03	2	C6		M	35.3	S
2010-09-03	2	C6		H	37	S
2010-09-03	2	C6		M	40.6	S
2010-09-03	2	C6		M	36.7	S
2010-09-03	2	C6		M	57.6	S
2010-09-03	2	C6		H	31.5	S
2010-09-03	2	C6		H	37	S
2010-09-03	2	C6		M	25	S
2010-09-03	2	C7		H	20	S
2010-09-03	2	C7		M	23.2	S
2010-09-03	2	C7		M	16.9	S
2010-09-03	2	C7		M	20	S
2010-09-03	2	C7		M	21.7	S
2010-09-03	2	C7		M	29.6	S
2010-09-03	2	C7		H	27	S
2010-09-03	2	C7		M	27	S
2010-09-03	2	C7		H	35.7	E
2010-09-03	2	7.2	1	M	7.7	S
2010-09-03	2	C9		M	20.7	S
2010-09-03	2	C9		M	31.5	S
2010-09-03	2	8.2	2	M	21.8	S
2010-09-03	2	C8		M	21	S
2010-09-03	2	C8		H	24.7	S
2010-09-03	2	C8		H	35.4	S
2010-09-03	2	C8		M	12.1	S
2010-09-03	2	C10		M	21.2	S
2010-09-03	2	C10		M	19.5	S
2010-09-03	2	C10		H	34	S
2010-09-03	2	C10		M	21.4	S
2010-09-03	2	C10		M	17.2	E
2010-09-03	2	C10		H	21	S
2010-09-03	2	C10		H	38	S
2010-09-03	2	C10		M	24.5	S
2010-09-03	2	C10		H	29.6	S
2010-09-03	2	C10		H	31	S
2010-09-03	2	C10		H	24	S
2010-09-03	2	C10		M	23	S
2010-09-03	2	C10		M	20.5	S
2010-09-03	2	C10		H	22.3	S
2010-09-03	2	C10		H	22	S
2010-09-03	2	C10		H	38.4	E
2010-09-03	2	C10		M	23.4	S
2010-09-03	2	C10		M	34	E
2010-09-03	2	C10		M	37.6	S
2010-09-03	2	C10		H	46.4	S
2010-09-03	2	C10		H	21	S
2010-09-03	2	C10		H	22.6	E
2010-09-03	2	C10		M	23	S
2010-09-03	2	C10		M	21.8	S
2010-09-03	2	C10		H	31.9	S
2010-09-03	2	C10		M	19.7	S
2010-09-03	2	C10		M	18.9	S
2010-09-03	2	C10		M	27.3	S
2010-09-03	2	C10		H	20.4	E
2010-09-03	2	C10		H	24	S
2010-09-03	2	C10		H	21.3	S
2010-09-03	2	C10		H	26.9	S
2010-09-03	2	C10		H	22.4	S
2010-09-03	2	C10		H	18	S
2010-09-03	2	C10		M	22.1	S
2010-12-08	2	C1		M	32	E
2010-12-08	2	C1		M	32.9	E
2010-12-08	2	C1		M	35.2	S
2010-12-08	2	1.103	2	M	13	E
2010-12-08	2	2.7	3	H	6.5	S
2010-12-08	2	C2		M	36.4	S
2010-12-08	2	C2		M	14.9	E
2010-12-08	2	C2		M	29	E
2010-12-08	2	C2		H	17.5	S
2010-12-08	2	C2		H	33.2	S
2010-12-08	2	C2		H	37.3	S
2010-12-08	2	C4		M	21	E
2010-12-08	2	C4		H	33.3	S
2010-12-08	2	C4		M	52.9	S
2010-12-08	2	C4		M	34	S
2010-12-08	2	C4		M	42	S
2010-12-08	2	C4		M	39.5	S
2010-12-08	2	C4		H	33	S
2010-12-08	2	C4		M	41	S
2010-12-08	2	C4		M	44.5	S
2010-12-08	2	C4		H	36	S
2010-12-08	2	C4		M	23.5	E
2010-12-08	2	C4		H	33.9	S
2010-12-08	2	3.91	2	M	31	S
2010-12-08	2	4.72	1	U	12	S
2010-12-08	2	C5		H	23.5	S
2010-12-08	2	C5		M	24.2	S
2010-12-08	2	C5		M	19	S
2010-12-08	2	C5		M	30	E
2010-12-08	2	C5		H	18	E
2010-12-08	2	C5		H	29.9	E
2010-12-08	2	C6		M	40.5	S
2010-12-08	2	C6		H	40.8	S
2010-12-08	2	C6		M	39.5	S
2010-12-08	2	C6		H	39	S
2010-12-08	2	C6		M	32.4	S
2010-12-08	2	C6		M	15.3	S
2010-12-08	2	C6		M	40.7	S
2010-12-08	2	C6		M	41.7	S
2010-12-08	2	C6		H	21.6	S
2010-12-08	2	C6		H	37.4	E
2010-12-08	2	C6		H	37.3	S
2010-12-08	2	C6		M	39.2	S
2010-12-08	2	C6		M	37	S
2010-12-08	2	C6		H	36.3	S
2010-12-08	2	C9		H	48	S
2010-12-08	2	C8		H	49.4	E
2010-12-08	2	C8		M	32.3	S
2010-12-08	2	C8		M	34.3	S
2010-12-08	2	C8		M	21.9	S
2010-12-08	2	C10		M	34.3	S
2010-12-08	2	C10		M	32	S
2011-03-02	2	1.1	3	H	19.1	S
2011-03-02	2	1.62	2	M	13.5	S
2011-03-02	2	1.9	2	M	17	E
2011-03-02	2	2.21	3	M	15	E
2011-03-02	2	2.21	3	M	19.9	S
2011-03-02	2	C4		H	34.4	E
2011-03-02	2	C5		M	42	S
2011-03-02	2	C5		H	31	S
2011-03-02	2	C5		M	21	S
2011-03-02	2	C5		M	28.8	S
2011-03-02	2	4.3	3	M	24	S
2011-03-02	2	C6		M	16.3	S
2011-03-02	2	C6		H	44.3	S
2011-03-02	2	C6		H	42.7	S
2011-03-02	2	C6		M	48.2	S
2011-03-02	2	C6		M	48.3	S
2011-03-02	2	C6		M	48.5	S
2011-03-02	2	C6		M	46.7	S
2011-03-02	2	C6		M	46.5	S
2011-03-02	2	C6		M	15-20	?
2011-03-02	2	C9		H	29.7	S
2011-03-02	2	C8		M	23.9	S
2011-03-02	2	C8		M	36.7	S
2011-03-02	2	C8		U	15-20	?
2011-03-02	2	C10		H	37.6	E
2011-05-26	2	C2		M	12.9	E
2011-05-26	2	C2		M	19.3	E
2011-05-26	2	2.1	2	H	11.2	S
2011-05-26	2	C4		M	14.2	S
2011-05-26	2	C4		M	66.4	S
2011-05-26	2	C4		M	17.2	S
2011-05-26	2	C4		M	28.9	S
2011-05-26	2	C3		M	42	S
2011-05-26	2	C3		H	39.5	S
2011-05-26	2	C3		M	70	S
2011-05-26	2	C3		M	69	S
2011-05-26	2	C3		H	60	S
2011-05-26	2	C3		M	57.1	S
2011-05-26	2	C3		H	26	S
2011-05-26	2	C3		H	59.6	S
2011-05-26	2	C3		H	40	S
2011-05-26	2	C5		M	13	S
2011-05-26	2	C5		H	15.9	S
2011-05-26	2	C5		H	43.2	S
2011-05-26	2	C5		M	35.1	S
2011-05-26	2	C5		M	14.1	E
2011-05-26	2	C6		H	61.6	S
2011-05-26	2	C6		M	21	S
2011-05-26	2	C6		M	12	S
2011-05-26	2	C6		M	46	S
2011-05-26	2	C6		M	56.8	S
2011-05-26	2	C6		M	17.2	S
2011-05-26	2	C6		H	59	S
2011-05-26	2	C6		H	17.4	S
2011-05-26	2	C6		M	11.8	S
2011-05-26	2	C6		H	20.6	S
2011-05-26	2	C7		M	19.7	S
2011-05-26	2	C7		M	29.6	S
2011-05-26	2	C9		M	11.6	S
2011-05-26	2	C8		M	19.7	S
2011-05-26	2	C8		M	17.3	S
2011-05-26	2	C8		H	20.6	S
2011-05-26	2	C8		M	20.7	S
2011-05-26	2	C10		H	38.4	S
2011-05-26	2	C10		H	63.5	S
2011-09-13	2	1.11	3	M	19	S
2011-09-13	2	1.11	3	M	24	S
2011-09-13	2	C1		M	19.5	E
2011-09-13	2	C1		M	22.8	E
2011-09-13	2	C1		H	20.5	S
2011-09-13	2	C1		H	24	E
2011-09-13	2	C1		H	48	S
2011-09-13	2	C1		M	20.2	S
2011-09-13	2	1.8	3	M	21.8	S
2011-09-13	2	1.8	3	M	18.5	S
2011-09-13	2	2.9	1	M	14	E
2011-09-13	2	2.51	3	M	17	S
2011-09-13	2	2.51	3	M	25.2	S
2011-09-13	2	C2		M	14	E
2011-09-13	2	C2		M	17	S
2011-09-13	2	C2		M	17.5	S
2011-09-13	2	C2		M	40.9	S
2011-09-13	2	C2		M	18.1	S
2011-09-13	2	C2		H	19	E
2011-09-13	2	C2		H	42.1	S
2011-09-13	2	C2		M	15	E
2011-09-13	2	C2		H	51	S
2011-09-13	2	C2		H	40	S
2011-09-13	2	C2		M	25.6	E
2011-09-13	2	C2		H	34.1	S
2011-09-13	2	C2		M	21	S
2011-09-13	2	C2		H	16.5	E
2011-09-13	2	C2		H	22.5	S
2011-09-13	2	C2		M	23	S
2011-09-13	2	C2		M	25.5	S
2011-09-13	2	C2		M	47	S
2011-09-13	2	C2		M	19.5	S
2011-09-13	2	C4		H	24	S
2011-09-13	2	C4		H	28.1	S
2011-09-13	2	C4		H	29.5	E
2011-09-13	2	C4		M	20.1	S
2011-09-13	2	C4		H	28	S
2011-09-13	2	C4		H	21.5	S
2011-09-13	2	C4		M	18.2	S
2011-09-13	2	C4		H	24.4	S
2011-09-13	2	C4		M	19.5	E
2011-09-13	2	C4		H	21.2	S
2011-09-13	2	C4		M	20	S
2011-09-13	2	3.7	3	M	18	E
2011-09-13	2	C3		H	26	S
2011-09-13	2	C3		H	23.5	E
2011-09-13	2	C5		H	22	S
2011-09-13	2	C5		H	17.5	S
2011-09-13	2	C5		H	18	S
2011-09-13	2	C5		H	19.5	S
2011-09-13	2	C5		H	20.2	S
2011-09-13	2	C5		M	27	S
2011-09-13	2	C5		M	20.1	S
2011-09-13	2	C5		M	24.1	S
2011-09-13	2	C5		H	50.5	S
2011-09-13	2	C5		M	41	S
2011-09-13	2	C5		H	54	S
2011-09-13	2	C5		H	35.2	S
2011-09-13	2	C5		H	10	S
2011-09-13	2	C5		H	35.6	S
2011-09-13	2	C5		H	26	S
2011-09-13	2	C5		H	19.2	S
2011-09-13	2	C5		H	30	S
2011-09-13	2	C5		H	48.2	S
2011-09-13	2	C6		M	16	E
2011-09-13	2	C6		M	28	S
2011-09-13	2	C6		M	21	S
2011-09-13	2	C6		H	21.3	S
2011-09-13	2	C7		M	16.3	S
2011-09-13	2	C7		M	16	S
2011-09-13	2	C7		H	21.4	S
2011-09-13	2	C7		M	32.1	S
2011-09-13	2	C7		M	16.5	E
2011-09-13	2	C7		M	18.1	S
2011-09-13	2	C7		H	22	S
2011-09-13	2	C9		M	20	S
2011-09-13	2	C9		M	15.4	E
2011-09-13	2	C9		M	15.4	E
2011-09-13	2	C9		M	17.2	E
2011-09-13	2	C8		H	22	S
2011-09-13	2	C8		M	39.3	E
2011-09-13	2	C10		M	12.4	S
2011-09-13	2	C10		M	14.6	S
2011-09-13	2	C10		M	22.4	S
2011-09-13	2	C10		H	59.2	S
2011-09-13	2	C10		M	15.2	S
2011-09-13	2	C10		M	26.7	S
2011-09-13	2	C10		M	14.6	S
2011-09-13	2	C10		H	38.7	S
2011-09-13	2	C10		M	18.2	S
2011-09-13	2	C10		H	52	S
2011-09-13	2	C10		M	39.7	S
2011-09-13	2	C10		H	19.7	S
2011-09-13	2	C10		H	38	S
2011-09-13	2	C10		M	21.6	S
2011-09-13	2	9.1	2	M	19.7	E
2012-01-24	2	1.2	3	M	20.4	S
2012-01-24	2	1.2	3	H	14.5	E
2012-01-24	2	1.5	2	H	13.5	S
2012-01-24	2	C1		M	37.1	S
2012-01-24	2	C1		M	46	S
2012-01-24	2	C1		H	33	S
2012-01-24	2	C1		H	19	E
2012-01-24	2	C1		H	20.2	S
2012-01-24	2	1.81	1	H	10	S
2012-01-24	2	1.8	3	M	10-15	S
2012-01-24	2	1.8	3	H	10-15	S
2012-01-24	2	1.8	3	M	23	S
2012-01-24	2	1.83	2	M	12	S
2012-01-24	2	1.9	3	H	12.5	E
2012-01-24	2	2.9	2	M	14	S
2012-01-24	2	2.82	1	H	10	E
2012-01-24	2	2.6	3	H	26.5	E
2012-01-24	2	2.5	3	M	18	S
2012-01-24	2	2.5	3	M	22.5	S
2012-01-24	2	2.5	3	H	18.5	S
2012-01-24	2	2.5	3	H	13.6	S
2012-01-24	2	2.5	3	M	37.1	S
2012-01-24	2	C2		M	21	E
2012-01-24	2	C2		H	25	S
2012-01-24	2	3.1	2	H	14.1	E
2012-01-24	2	3.1	3	H	37.5	S
2012-01-24	2	3.1	3	H	24	S
2012-01-24	2	C4		H	32	E
2012-01-24	2	C4		M	33.5	S
2012-01-24	2	C4		M	21	E
2012-01-24	2	C4		M	26.2	S
2012-01-24	2	3.6	3	H	23	S
2012-01-24	2	3.6	3	H	19.5	S
2012-01-24	2	C3		M	18.5	E
2012-01-24	2	C3		M	25.1	S
2012-01-24	2	C3		H	24.5	S
2012-01-24	2	3.81	2	M	14	E
2012-01-24	2	4.4	2	H	28.5	S
2012-01-24	2	4.4	2	M	15.5	E
2012-01-24	2	C5		M	15	S
2012-01-24	2	C5		H	28	S
2012-01-24	2	C5		M	25.7	E
2012-01-24	2	C5		H	38	S
2012-01-24	2	C5		M	32.2	E
2012-01-24	2	C6		H	29.6	S
2012-01-24	2	C6		H	37	S
2012-01-24	2	C6		M	36.5	S
2012-01-24	2	C6		M	35	S
2012-01-24	2	C6		M	52.7	S
2012-01-24	2	C6		H	39.3	S
2012-01-24	2	C6		M	41.3	S
2012-01-24	2	C6		M	46	S
2012-01-24	2	C6		M	40	S
2012-01-24	2	5.6	1	M	28	S
2012-01-24	2	5.4	2	M	28.5	S
2012-01-24	2	C7		M	17.2	S
2012-01-24	2	C7		M	30.8	S
2012-01-24	2	C7		M	19.6	S
2012-01-24	2	6.3		M	27.5	S
2012-01-24	2	6.3		H	30-35	S
2012-01-24	2	C8		H	36.6	S
2012-01-24	2	C8		H	42.7	S
2012-01-24	2	C8		H	29	S
2012-01-24	2	8.4	2	M	11.4	S
2012-01-24	2	8.4	3	M	25	S
2012-01-24	2	C9		M	15	S
2012-01-24	2	C9		M	15.8	S
2012-01-24	2	C9		H	30.8	S
2012-01-24	2	C9		H	19	S
2012-01-24	2	C9		M	37.6	S
2012-01-24	2	C9		M	42.7	S
2012-01-24	2	C10		H	17.3	S
2012-01-24	2	C10		H	24.5	S
2012-01-24	2	C10		H	42.6	S
2012-01-24	2	C10		H	43	S
2012-01-24	2	C10		M	17	S
2012-01-24	2	C10		H	23	S
2012-01-24	2	C10		H	23	S
2012-01-24	2	C10		M	26.7	S
2012-01-24	2	C10		M	34.5	S
2012-04-21	2	1.1	3	M	25.4	S
2012-04-21	2	1.41	2	M	11.7	E
2012-04-21	2	1.42	2	H	9.6	S
2012-04-21	2	C1		M	23.8	E
2012-04-21	2	C1		H	21.6	S
2012-04-21	2	C1		H	22	S
2012-04-21	2	C1		H	32.2	E
2012-04-21	2	C1		H	15.9	S
2012-04-21	2	C1		M	14.9	E
2012-04-21	2	C1		M	24.5	E
2012-04-21	2	1.8	3	M	25.2	S
2012-04-21	2	1.8	3	M	15.1	E
2012-04-21	2	1.8	3	M	19.9	S
2012-04-21	2	2.5	3	H	14.7	E
2012-04-21	2	2.4	3	H	33.4	S
2012-04-21	2	2.4	3	H	26.1	S
2012-04-21	2	C2		M	44.9	S
2012-04-21	2	C2		H	50	S
2012-04-21	2	C2		H	29.5	S
2012-04-21	2	C2		H	49.3	S
2012-04-21	2	C2		H	29.9	S
2012-04-21	2	2.1	2	M	11	S
2012-04-21	2	2.1	2	H	11	E
2012-04-21	2	3.1	1	M	20	S
2012-04-21	2	3.4	2	H	14	S
2012-04-21	2	C4		M	41.4	E
2012-04-21	2	3.4	2	M	29.3	E
2012-04-21	2	C3		M	15.4	S
2012-04-21	2	C3		M	34.8	S
2012-04-21	2	C3		H	31	S
2012-04-21	2	C3		H	31.1	E
2012-04-21	2	C3		M	28.8	S
2012-04-21	2	C3		H	37.7	S
2012-04-21	2	C3		M	19.6	E
2012-04-21	2	C3		H	44.6	S
2012-04-21	2	4.81	2	H	23.5	S
2012-04-21	2	4.81	2	M	23	S
2012-04-21	2	C5		M	11.5	E
2012-04-21	2	C5		M	40.1	S
2012-04-21	2	4.5	3	H	19.7	E
2012-04-21	2	C7		M	14.8	E
2012-04-21	2	6.7	2	H	39.6	E
2012-04-21	2	7.61	1	M	22.1	S
2012-04-21	2	7.61	1	M	14.5	S
2012-04-21	2	C8		H	29	S
2012-04-21	2	C8		H	42.3	S
2012-04-21	2	C8		H	35.2	S
2012-04-21	2	C8		M	50	S
2012-04-21	2	8.3	2	M	23.4	S
2012-04-21	2	8.3	2	M	9.6	S
2012-04-21	2	8.3	2	M	26.7	S
2012-04-21	2	C9		M	25	S
2012-04-21	2	C9		H	31.6	S
2012-04-21	2	C10		H	19.8	S
2012-04-21	2	C10		M	19	E
2012-04-21	2	C10		M	40.4	S
2012-09-06	2	1.1	3	M	20	E
2012-09-06	2	1.2	3	M	23.5	E
2012-09-06	2	1.2	3	M	23	S
2012-09-06	2	1.2	3	H	32.5	S
2012-09-06	2	C1		M	16	S
2012-09-06	2	2.5	3	H	29.5	E
2012-09-06	2	3.1	2	M	19.2	S
2012-09-06	2	3.1	2	H	9.5	S
2012-09-06	2	C4		H	31	S
2012-09-06	2	C4		M	41.9	S
2012-09-06	2	3.7	3	M	22	S
2012-09-06	2	C3		H	35.1	E
2012-09-06	2	C3		H	48.2	S
2012-09-06	2	C3		H	35.1	S
2012-09-06	2	C5		M	21.3	S
2012-09-06	2	C5		M	29.5	S
2012-09-06	2	C5		M	23	S
2012-09-06	2	C7		H	36.9	S
2012-09-06	2	C7		M	42.6	S
2012-09-06	2	C7		M	32.7	S
2012-09-06	2	C7		H	32	S
2012-09-06	2	C7		H	52.2	S
2012-09-06	2	C7		M	59	S
2012-09-06	2	C7		H	70.1	S
2012-09-06	2	C6		H	27.3	E
2012-09-06	2	C8		H	30.5	S
2012-09-06	2	C10		H	28.7	S
2012-09-06	2	C10		M	37.8	S
2012-09-06	2	C10		M	18.9	S
2012-09-06	2	C10		M	25.3	E
2012-09-06	2	C10		M	19.5	S
2012-09-06	2	C10		H	25.5	E
2013-01-24	2	1.51	1	M	14	S
2013-01-24	2	C1		H	10	S
2013-01-24	2	C1		M	18.5	S
2013-01-24	2	C1		M	14.1	S
2013-01-24	2	C1		H	14	S
2013-01-24	2	C1		H	29.5	S
2013-01-24	2	C1		M	20	S
2013-01-24	2	C1		M	7	S
2013-01-24	2	C1		H	10.1	S
2013-01-24	2	C1		H	54	S
2013-01-24	2	C2		M	21	S
2013-01-24	2	C2		M	22.1	S
2013-01-24	2	C2		M	18.5	S
2013-01-24	2	C2		H	27.2	S
2013-01-24	2	C2		M	23.2	S
2013-01-24	2	C2		H	43.1	S
2013-01-24	2	C2		M	18	E
2013-01-24	2	C2		M	23	S
2013-01-24	2	C2		M	20	E
2013-01-24	2	C2		M	20	E
2013-01-24	2	C2		H	17	S
2013-01-24	2	C2		M	28.1	S
2013-01-24	2	C4		M	26	S
2013-01-24	2	C4		M	39.2	S
2013-01-24	2	C4		H	13	S
2013-01-24	2	C4		M	29.3	S
2013-01-24	2	C4		M	23	S
2013-01-24	2	C4		H	43	E
2013-01-24	2	C4		M	31	S
2013-01-24	2	C4		M	20	S
2013-01-24	2	C4		M	28	S
2013-01-24	2	C4		M	27	S
2013-01-24	2	C4		H	20	S
2013-01-24	2	C4		M	15	S
2013-01-24	2	C4		M	18.1	E
2013-01-24	2	C4		H	17.5	S
2013-01-24	2	C4		M	19	E
2013-01-24	2	C4		M	12	S
2013-01-24	2	C4		H	17.5	S
2013-01-24	2	C4		M	18.2	S
2013-01-24	2	C4		M	16.2	E
2013-01-24	2	C4		M	31.1	S
2013-01-24	2	C3		M	19	S
2013-01-24	2	C3		H	47	S
2013-01-24	2	C3		H	30.1	S
2013-01-24	2	C3		M	62	S
2013-01-24	2	C3		M	43.3	S
2013-01-24	2	C3		M	19	S
2013-01-24	2	C3		M	24	S
2013-01-24	2	C3		H	20	S
2013-01-24	2	C3		M	17	E
2013-01-24	2	C5		M	17.2	E
2013-01-24	2	C6		M	22.5	S
2013-01-24	2	C6		M	32.2	E
2013-01-24	2	C6		M	15.5	E
2013-01-24	2	C6		M	21.3	S
2013-01-24	2	C7		M	21	E
2013-01-24	2	C7		H	48.2	S
2013-01-24	2	C7		M	54	S
2013-01-24	2	C7		M	51.2	S
2013-01-24	2	C7		M	51.4	S
2013-01-24	2	C7		H	60	S
2013-01-24	2	C7		H	47.2	S
2013-01-24	2	C7		H	52.3	S
2013-01-24	2	C7		H	47.8	S
2013-01-24	2	C7		H	37.5	S
2013-01-24	2	C7		H	51	S
2013-01-24	2	C7		H	50.8	S
2013-01-24	2	C7		H	59	S
2013-01-24	2	8.3		H	53	S
2013-01-24	2	C8		M	10.7	S
2013-01-24	2	C8		M	20.4	E
2013-01-24	2	8.1		M	33.5	S
2013-01-24	2	C9		M	36.3	E
2013-01-24	2	C10		M	40.8	S
2013-05-16	2	C1		M	16.9	S
2013-05-16	2	C1		M	18.3	E
2013-05-16	2	C1		H	16.4	E
2013-05-16	2	1.82	1	M	15	S
2013-05-16	2	1.8	3	M	37.9	S
2013-05-16	2	C2		H	21.9	E
2013-05-16	2	2.22	3	M	21.4	S
2013-05-16	2	C4		H	33.4	S
2013-05-16	2	C3		M	39	S
2013-05-16	2	C3		M	46.2	S
2013-05-16	2	C3		H	34.3	S
2013-05-16	2	C3		M	45.4	S
2013-05-16	2	C3		M	12.2	S
2013-05-16	2	C5		M	13	S
2013-05-16	2	C6		M	15	S
2013-05-16	2	C8		H	36.7	E
2013-05-16	2	9.2	1	M	31.3	S
2013-05-16	2	9.3	1	M	31.3	S
2013-05-16	2	C10		M	12.4	S
2013-05-16	2	C10		H	20	S
2013-05-16	2	C10		M	15	E
2013-05-16	2	C10		M	13.4	E
2013-05-16	2	C10		M	30.3	S
2013-05-16	2	C10		M	32.6	S
2013-05-16	2	C10		H	18	S
2013-01-24	2	1.51	1	M	14	S
2013-01-24	2	C1		H	10	S
2013-01-24	2	C1		M	18.5	S
2013-01-24	2	C1		M	14.1	S
2013-01-24	2	C1		H	14	S
2013-01-24	2	C1		H	29.5	S
2013-01-24	2	C1		M	20	S
2013-01-24	2	C1		M	7	S
2013-01-24	2	C1		H	10.1	S
2013-01-24	2	C1		H	54	S
2013-01-24	2	C2		M	21	S
2013-01-24	2	C2		M	22.1	S
2013-01-24	2	C2		M	18.5	S
2013-01-24	2	C2		H	27.2	S
2013-01-24	2	C2		M	23.2	S
2013-01-24	2	C2		H	43.1	S
2013-01-24	2	C2		M	18	E
2013-01-24	2	C2		M	23	S
2013-01-24	2	C2		M	20	E
2013-01-24	2	C2		M	20	E
2013-01-24	2	C2		H	17	S
2013-01-24	2	C2		M	28.1	S
2013-01-24	2	C4		M	26	S
2013-01-24	2	C4		M	39.2	S
2013-01-24	2	C4		H	13	S
2013-01-24	2	C4		M	29.3	S
2013-01-24	2	C4		M	23	S
2013-01-24	2	C4		H	43	E
2013-01-24	2	C4		M	31	S
2013-01-24	2	C4		M	20	S
2013-01-24	2	C4		M	28	S
2013-01-24	2	C4		M	27	S
2013-01-24	2	C4		H	20	S
2013-01-24	2	C4		M	15	S
2013-01-24	2	C4		M	18.1	E
2013-01-24	2	C4		H	17.5	S
2013-01-24	2	C4		M	19	E
2013-01-24	2	C4		M	12	S
2013-01-24	2	C4		H	17.5	S
2013-01-24	2	C4		M	18.2	S
2013-01-24	2	C4		M	16.2	E
2013-01-24	2	C4		M	31.1	S
2013-01-24	2	C3		M	19	S
2013-01-24	2	C3		H	47	S
2013-01-24	2	C3		H	30.1	S
2013-01-24	2	C3		M	62	S
2013-01-24	2	C3		M	43.3	S
2013-01-24	2	C3		M	19	S
2013-01-24	2	C3		M	24	S
2013-01-24	2	C3		H	20	S
2013-01-24	2	C3		M	17	E
2013-01-24	2	C5		M	17.2	E
2013-01-24	2	C6		M	22.5	S
2013-01-24	2	C6		M	32.2	E
2013-01-24	2	C6		M	15.5	E
2013-01-24	2	C6		M	21.3	S
2013-01-24	2	C7		M	21	E
2013-01-24	2	C7		H	48.2	S
2013-01-24	2	C7		M	54	S
2013-01-24	2	C7		M	51.2	S
2013-01-24	2	C7		M	51.4	S
2013-01-24	2	C7		H	60	S
2013-01-24	2	C7		H	47.2	S
2013-01-24	2	C7		H	52.3	S
2013-01-24	2	C7		H	47.8	S
2013-01-24	2	C7		H	37.5	S
2013-01-24	2	C7		H	51	S
2013-01-24	2	C7		H	50.8	S
2013-01-24	2	C7		H	59	S
2013-01-24	2	8.3		H	53	S
2013-01-24	2	C8		M	10.7	S
2013-01-24	2	C8		M	20.4	E
2013-01-24	2	8.1		M	33.5	S
2013-01-24	2	C9		M	36.3	E
2013-01-24	2	C9		M	24.2	S
2013-01-24	2	C10		M	40.8	S
2013-05-16	2	C1		M	16.9	S
2013-05-16	2	C1		M	18.3	E
2013-05-16	2	C1		H	16.4	E
2013-05-16	2	1.82	1	M	15	S
2013-05-16	2	1.8	3	M	37.9	S
2013-05-16	2	C2		H	21.9	E
2013-05-16	2	2.22	3	M	21.4	S
2013-05-16	2	C4		H	33.4	S
2013-05-16	2	C3		M	39	S
2013-05-16	2	C3		M	46.2	S
2013-05-16	2	C3		H	34.3	S
2013-05-16	2	C3		M	45.4	S
2013-05-16	2	C3		M	12.2	S
2013-05-16	2	C5		M	13	S
2013-05-16	2	C6		M	15	S
2013-05-16	2	C8		H	36.7	E
2013-05-16	2	9.2	1	M	31.3	S
2013-05-16	2	9.3	1	M	31.3	S
2013-05-16	2	C10		M	12.4	S
2013-05-16	2	C10		H	20	S
2013-05-16	2	C10		M	15	E
2013-05-16	2	C10		M	13.4	E
2013-05-16	2	C10		M	30.3	S
2013-05-16	2	C10		M	32.6	S
2013-05-16	2	C10		H	18	S
2013-09-24	2	1.1	3	M	22.4	S
2013-09-24	2	C1		M	18.5	S
2013-09-24	2	C1		M	18	S
2013-09-24	2	C1		M	15	E
2013-09-24	2	2.5	3	M	21.1	S
2013-09-24	2	C2		H	10	E
2013-09-24	2	C2		H	45	S
2013-09-24	2	C2		H	23.2	S
2013-09-24	2	C2		M	25.1	S
2013-09-24	2	C2		H	15.2	S
2013-09-24	2	C2		M	21.3	S
2013-09-24	2	C2		M	22	S
2013-09-24	2	C2		M	19.8	E
2013-09-24	2	C2		M	14	S
2013-09-24	2	C2		M	14.1	S
2013-09-24	2	C2		H	22.2	S
2013-09-24	2	C2		M	27.3	S
2013-09-24	2	C2		H	23.1	S
2013-09-24	2	C2		H	48	S
2013-09-24	2	C2		M	22.3	S
2013-09-24	2	C2		H	18.4	S
2013-09-24	2	C4		H	26	E
2013-09-24	2	C3		M	17	S
2013-09-24	2	C3		H	18.5	S
2013-09-24	2	C3		H	36	S
2013-09-24	2	C3		M	16	E
2013-09-24	2	C3		M	29	S
2013-09-24	2	C3		H	21	S
2013-09-24	2	C3		M	17.5	S
2013-09-24	2	C3		M	30.5	S
2013-09-24	2	C5		M	34	S
2013-09-24	2	C5		M	18	E
2013-09-24	2	C5		M	18.1	E
2013-09-24	2	C5		M	22	S
2013-09-24	2	C6		H	14	E
2013-09-24	2	C6		M	15.1	S
2013-09-24	2	C6		H	18.3	S
2013-09-24	2	C6		H	16.9	S
2013-09-24	2	C6		M	21	S
2013-09-24	2	C6		H	31.7	S
2013-09-24	2	C6		M	46.9	S
2013-09-24	2	C6		H	22.9	S
2013-09-24	2	C6		M	17.2	S
2013-09-24	2	C6		H	32	S
2013-09-24	2	C6		M	35.7	S
2013-09-24	2	C6		M	16.1	E
2013-09-24	2	C6		H	28.3	S
2013-09-24	2	C6		M	21.8	S
2013-09-24	2	C6		M	33	S
2013-09-24	2	C6		H	25.2	S
2013-09-24	2	C6		M	26.3	S
2013-09-24	2	C6		H	49	S
2013-09-24	2	C6		H	40.3	S
2013-09-24	2	C6		M	31.8	S
2013-09-24	2	C6		M	51.5	S
2013-09-24	2	C6		M	18.2	S
2013-09-24	2	C6		M	19	S
2013-09-24	2	C6		M	19.3	S
2013-09-24	2	C6		H	32.9	S
2013-09-24	2	C6		M	36.4	S
2013-09-24	2	C6		H	18.9	S
2013-09-24	2	C6		M	49.1	S
2013-09-24	2	C6		H	31.4	S
2013-09-24	2	C7		M	19	E
2013-09-24	2	C7		M	23	E
2013-09-24	2	C7		M	20.4	S
2013-09-24	2	C9		U	12	E
2013-09-24	2	C9		H	15.8	E
2013-09-24	2	8.3	2	H	17.4	S
2013-09-24	2	8.3	2	M	15.5	S
2013-09-24	2	8.3	2	H	18.5	S
2013-09-24	2	C8		M	18.3	S
2013-09-24	2	C8		M	17.4	E
2013-09-24	2	C8		M	17.5	S
2013-09-24	2	C8		M	19.4	E
2013-09-24	2	C8		H	22.4	E
2013-09-24	2	C10		H	17.5	S
2013-09-24	2	C10		M	15	S
2013-09-24	2	C10		M	21.4	E
2014-01-29	2	1.1	3	H	21.4	S
2014-01-29	2	1.2	3	M	32.9	E
2014-01-29	2	C1		H	22.1	E
2014-01-29	2	C1		M	9.7	S
2014-01-29	2	C1		M	9.4	S
2014-01-29	2	2.5	3	M	20.5	S
2014-01-29	2	2.5	3	M	17.4	S
2014-01-29	2	C2		H	14.7	S
2014-01-29	2	2.23	3	M	14.7	S
2014-01-29	2	C4		M	17.6	S
2014-01-29	2	C4		M	22	S
2014-01-29	2	C4		M	17.9	S
2014-01-29	2	C4		H	22.6	E
2014-01-29	2	C4		M	18.2	S
2014-01-29	2	C4		M	20.2	S
2014-01-29	2	3.8	3	M	17.8	S
2014-01-29	2	C3		M	26	S
2014-01-29	2	C3		M	18.1	E
2014-01-29	2	4.82	2	M	19.3	S
2014-01-29	2	C5		H	13.1	S
2014-01-29	2	C5		H	17.2	S
2014-01-29	2	C5		M	20.7	S
2014-01-29	2	C5		M	18.2	S
2014-01-29	2	C5		M	17.7	S
2014-01-29	2	C5		H	13.5	S
2014-01-29	2	C5		H	15.3	E
2014-01-29	2	C5		H	19.5	S
2014-01-29	2	C5		M	18.5	S
2014-01-29	2	C6		H	17.4	E
2014-01-29	2	C6		M	27.1	E
2014-01-29	2	C6		M	11.6	E
2014-01-29	2	C7		M	21.3	S
2014-01-29	2	C7		H	29.2	E
2014-01-29	2	C9		H	43	S
2014-01-29	2	C9		M	18.5	S
2014-01-29	2	C9		M	44.7	S
2014-01-29	2	C9		M	42.1	S
2014-01-29	2	C8		M	17.5	E
2014-01-29	2	C8		M	25.7	S
2014-01-29	2	C8		H	20	S
2014-01-29	2	C10		H	44.8	E
2014-06-11	2	C1		M	14.5	S
2014-06-11	2	C2		M	13	E
2014-06-11	2	C2		H	16.2	S
2014-06-11	2	C4		M	14	E
2014-06-11	2	C4		M	25	S
2014-06-11	2	C3		H	15.1	E
2014-06-11	2	C3		M	23	S
2014-06-11	2	C3		H	19.5	S
2014-06-11	2	C3		M	21.5	E
2014-06-11	2	C3		M	28.2	S
2014-06-11	2	C3		M	16	S
2014-06-11	2	C3		M	18	E
2014-06-11	2	C3		M	27.2	S
2014-06-11	2	C3		H	39.5	S
2014-06-11	2	C3		H	16.3	S
2014-06-11	2	C3		M	20.8	S
2014-06-11	2	C3		M	15	S
2014-06-11	2	C3		M	16	S
2014-06-11	2	C3		H	20.5	S
2014-06-11	2	C5		M	42.6	S
2014-06-11	2	C6		H	12	S
2014-06-11	2	C6		M	55.7	S
2014-06-11	2	C6		M	26.5	S
2014-06-11	2	C6		H	15.4	S
2014-06-11	2	C6		H	17	S
2014-06-11	2	C6		M	18.9	S
2014-06-11	2	C6		M	22	S
2014-06-11	2	C6		H	54.8	E
2014-06-11	2	C7		M	18.7	E
2014-06-11	2	C7		M	12	S
2014-06-11	2	C8		H	9	S
2014-06-11	2	C8		M	10	E
2014-06-11	2	C8		M	27.6	S
2014-06-11	2	C8		M	15.5	S
2014-06-11	2	C10		M	19	S
2014-06-11	2	C10		M	12.2	E
2014-06-11	2	C10		M	21.6	S
2014-06-11	2	C10		H	19	S
2014-09-08	2	1.6	2	M	13.3	S
2014-09-08	2	C1		M	10	S
2014-09-08	2	C2		M	13.9	E
2014-09-08	2	C2		M	21.4	S
2014-09-08	2	C4		H	24	E
2014-09-08	2	C4		M	17	S
2014-09-08	2	C4		M	34.5	E
2014-09-08	2	C3		M	18.5	E
2014-09-08	2	C3		M	9.1	E
2014-09-08	2	C3		H	10	E
2014-09-08	2	C3		M	8.1	E
2014-09-08	2	C3		M	14.7	E
2014-09-08	2	C6		M	20	S
2014-09-08	2	C6		M	11	S
2014-09-08	2	C6		H	10	S
2014-09-08	2	C8		M	11.8	E
2014-09-08	2	C9		M	15.5	S
2014-09-08	2	C9		M	23.7	S
2014-09-08	2	C9		M	24.2	S
2014-09-08	2	C9		M	20.6	S
2014-09-08	2	C9		M	22	S
2014-09-08	2	C9		H	11.4	E
2014-09-08	2	C9		M	35.3	S
2014-09-08	2	C9		H	22.4	S
2014-09-08	2	C9		M	26.4	S
2014-09-08	2	C9		H	18.4	S
2014-09-08	2	C9		H	17.7	S
2014-09-08	2	C9		H	16	S
2014-09-08	2	C9		M	15.4	S
2014-09-08	2	C10		M	30.3	S
2014-09-08	2	C10		H	48	S
2014-09-08	2	C10		H	38.6	S
2014-09-08	2	C10		M	35.4	S
2014-09-08	2	C10		M	36.7	S
2015-01-15	2	C1		H	9.3	S
2015-01-15	2	C1		M	19.9	S
2015-01-15	2	C2		H	17.3	E
2015-01-15	2	C4		H	17.5	S
2015-01-15	2	C4		H	42.3	E
2015-01-15	2	C4		U	10	S
2015-01-15	2	C3		M	40	E
2015-01-15	2	C5		H	17.3	E
2015-01-15	2	C5		M	57.7	S
2015-01-15	2	C5		M	33	S
2015-01-15	2	C5		H	29.6	S
2015-01-15	2	C5		M	40.5	S
2015-01-15	2	C6		U	10.6	E
2015-01-15	2	C6		M	36.4	E
2015-01-15	2	C7		M	38.6	S
2015-01-15	2	C7		H	39.9	E
2015-01-15	2	C7		H	33.4	S
2015-01-15	2	C7		M	33.7	S
2015-01-15	2	C7		H	30	S
2015-01-15	2	C7		H	18.6	E
2015-01-15	2	C7		H	21.4	S
2015-01-15	2	C8		M	16.6	S
2015-01-15	2	C8		M	20	S
2015-01-15	2	C8		H	29.6	S
2015-01-15	2	C8		H	37.4	S
2015-01-15	2	8.3	2	M	43.5	S
2015-01-15	2	C9		M	17.7	S
2015-01-15	2	C9		H	42.7	E
2015-01-15	2	C9		H	19.3	S
2015-01-15	2	C10		M	17	E
2015-01-15	2	C10		M	27	E
2009-11-23	4	C1		M	31.8	S
2009-11-23	4	C1		M	32.7	S
2009-11-23	4	C1		H	32.4	S
2009-11-23	4	C1		M	17.5	E
2009-11-23	4	C1		H	34	S
2009-11-23	4	C1		H	25.4	S
2009-11-23	4	C1		H	24	S
2009-11-23	4	C1		M	39.6	S
2009-11-23	4	C1		M	23	E
2009-11-23	4	C1		M	27.2	S
2009-11-23	4	C1		M	32.3	E
2009-11-23	4	C1		H	28.3	S
2009-11-23	4	C2		M	21	S
2009-11-23	4	C2		H	34.6	S
2009-11-23	4	C2		H	34	S
2009-11-23	4	C2		M	19.4	S
2009-11-23	4	C2		M	26.3	S
2009-11-23	4	C2		H	26.5	S
2009-11-23	4	C2		H	42.7	E
2009-11-23	4	C2		M	36	E
2009-11-23	4	C2		M	25.4	S
2009-11-23	4	C2		M	24	S
2009-11-23	4	C2		H	23.2	S
2009-11-23	4	C2		H	20.7	S
2009-11-23	4	C2		H	18.7	S
2009-11-23	4	C2		M	17.7	S
2009-11-23	4	C2		H	23.2	S
2009-11-23	4	C2		M	31.9	S
2009-11-23	4	C2		H	25.2	S
2009-11-23	4	C2		M	32	S
2009-11-23	4	C2		M	21.3	S
2009-11-23	4	C2		M	19	S
2009-11-23	4	C2		H	19.2	S
2009-11-23	4	C2		H	18.4	S
2009-11-23	4	C2		M	19.4	S
2009-11-23	4	C2		H	32.1	S
2009-11-23	4	C2		M	23.4	S
2009-11-23	4	C2		H	24.3	S
2009-11-23	4	C2		M	25.5	S
2009-11-23	4	C3		M	19.9	E
2009-11-23	4	C3		M	20.5	S
2009-11-23	4	C3		H	30.2	S
2009-11-23	4	C3		M	18.7	S
2009-11-23	4	C3		M	39.7	S
2009-11-23	4	C3		M	38.7	E
2009-11-23	4	C3		H	36.8	S
2009-11-23	4	C3		M	26	S
2009-11-23	4	C3		M	32.5	S
2009-11-23	4	C3		M	19.7	S
2009-11-23	4	C4		M	14	S
2009-11-23	4	C4		M	25.3	S
2009-11-23	4	C4		M	29	E
2009-11-23	4	C4		M	19.6	S
2009-11-23	4	C4		H	31	S
2009-11-23	4	C4		M	39	S
2009-11-23	4	C4		H	29.4	S
2009-11-23	4	C5		H	35	E
2009-11-23	4	C5		H	31.4	S
2009-11-23	4	C5		H	37.7	S
2009-11-23	4	C5		H	28.6	S
2009-11-23	4	C5		H	23	S
2009-11-23	4	C5		H	33.2	S
2009-11-23	4	C5		M	29.2	S
2009-11-23	4	C5		M	24.7	S
2009-11-23	4	C5		M	27.6	S
2009-11-23	4	C5		M	25	S
2009-11-23	4	C5		M	15.4	S
2009-11-23	4	C5		M	19.3	S
2009-11-23	4	C7		H	29.4	S
2009-11-23	4	C7		H	28.5	S
2009-11-23	4	C7		H	49.8	S
2009-11-23	4	C7		M	34.3	S
2009-11-23	4	C7		M	46.4	S
2009-11-23	4	C7		M	42.3	S
2009-11-23	4	C7		M	31	S
2009-11-23	4	C7		H	33.5	S
2009-11-23	4	C7		M	51.6	S
2009-11-23	4	C7		M	33.4	S
2009-11-23	4	C7		H	18.7	E
2009-11-23	4	C7		H	43	S
2009-11-23	4	C7		M	40.3	S
2009-11-23	4	C7		M	41	S
2009-11-23	4	C7		M	38.7	S
2009-11-23	4	C7		M	33.6	S
2009-11-23	4	C7		H	40.5	S
2009-11-23	4	C7		M	25	S
2009-11-23	4	C7		M	15	S
2009-11-23	4	C7		M	28.9	S
2009-11-23	4	C7		M	45.7	S
2009-11-23	4	C7		M	40.6	S
2009-11-23	4	C7		M	20.5	S
2009-11-23	4	C7		H	30	S
2009-11-23	4	C7		H	38.6	S
2009-11-23	4	C7		H	42	S
2009-11-23	4	C7		H	30.6	S
2009-11-23	4	C7		M	39	S
2009-11-23	4	C7		M	21.7	S
2009-11-23	4	C7		M	21.3	S
2009-11-23	4	C7		H	30	S
2009-11-23	4	C7		H	14.3	S
2009-11-23	4	C7		M	40.5	S
2009-11-23	4	C7		H	30.6	S
2009-11-23	4	C7		M	24.4	S
2009-11-23	4	C7		M	15	S
2009-11-23	4	C7		M	21	S
2009-11-23	4	C7		H	40.4	S
2009-11-23	4	C7		H	39	S
2009-11-23	4	C7		M	31	S
2009-11-23	4	C7		M	36	S
2009-11-23	4	C7		M	40.5	S
2009-11-23	4	C7		M	33	S
2009-11-23	4	C7		M	38.6	S
2009-11-23	4	C7		M	26.6	S
2009-11-23	4	C7		H	48	S
2009-11-23	4	C7		M	25.4	E
2009-11-23	4	C7		M	23	S
2009-11-23	4	C7		H	48.7	S
2009-11-23	4	C7		H	38.5	S
2009-11-23	4	C7		M	30.5	S
2009-11-23	4	C7		H	19	S
2009-11-23	4	C7		M	19.4	S
2009-11-23	4	C7		H	34.9	S
2009-11-23	4	C7		H	33.5	S
2009-11-23	4	C7		H	37	S
2009-11-23	4	C7		H	24	S
2009-11-23	4	C7		H	30	S
2009-11-23	4	C7		M	16	S
2009-11-23	4	C7		H	33.2	S
2009-11-23	4	C7		M	43.3	S
2009-11-23	4	C7		H	41.9	S
2009-11-23	4	C7		M	27.8	S
2009-11-23	4	C7		M	32.5	S
2009-11-23	4	C7		H	38.5	S
2009-11-23	4	C7		M	50.6	S
2009-11-23	4	C7		M	46.4	S
2009-11-23	4	C7		H	44.3	S
2009-11-23	4	C7		M	29.4	S
2009-11-23	4	C7		M	27.3	S
2009-11-23	4	C7		M	28	S
2009-11-23	4	C7		H	37.2	S
2009-11-23	4	C7		H	39.4	S
2009-11-23	4	C7		M	41.3	S
2009-11-23	4	C7		H	14	S
2009-11-23	4	C7		H	39	S
2009-11-23	4	C7		H	51.3	S
2009-11-23	4	C7		M	39.8	S
2009-11-23	4	C7		M	42.3	S
2009-11-23	4	C7		M	27	S
2009-11-23	4	C7		M	50.5	S
2009-11-23	4	C7		M	40	S
2009-11-23	4	C7		M	31.2	S
2009-11-23	4	C7		H	34.3	S
2009-11-23	4	C7		M	29	S
2009-11-23	4	C7		M	41.4	S
2009-11-23	4	C7		M	34	S
2009-11-23	4	C7		M	40.5	S
2009-11-23	4	C7		M	47.2	S
2009-11-23	4	C7		H	31.4	S
2009-11-23	4	C7		M	16.4	S
2009-11-23	4	C7		M	40.6	S
2009-11-23	4	C7		M	36	S
2009-11-23	4	C7		M	32	S
2009-11-23	4	C7		M	24.1	S
2009-11-23	4	C7		M	18.7	S
2009-11-23	4	C7		M	36	S
2009-11-23	4	C7		H	26.6	E
2009-11-23	4	C7		M	28.7	S
2009-11-23	4	C7		H	33.6	S
2009-11-23	4	C7		M	30.7	S
2009-11-23	4	C7		M	18.5	S
2009-11-23	4	C7		M	18	S
2009-11-23	4	C7		M	28.6	S
2009-11-23	4	C7		M	32.7	S
2009-11-23	4	C7		H	24	S
2009-11-23	4	C7		M	18.7	S
2009-11-23	4	C8		H	35.3	E
2009-11-23	4	C8		H	31	E
2009-11-23	4	C8		M	27	S
2009-11-23	4	C8		H	27.5	S
2009-11-23	4	C8		H	22	E
2009-11-23	4	C9		H	34.5	S
2009-11-23	4	C9		M	39.4	S
2009-11-23	4	C9		M	28	S
2009-11-23	4	C9		H	42	S
2009-11-23	4	C9		H	21	S
2009-11-23	4	C9		H	22.5	S
2009-11-23	4	C9		M	45.5	S
2009-11-23	4	C9		M	20.5	S
2009-11-23	4	C9		M	39.9	S
2009-11-23	4	C9		M	58.7	S
2009-11-23	4	C9		H	30.5	S
2009-11-23	4	C9		H	41.2	S
2009-11-23	4	C9		H	38.4	S
2009-11-23	4	C9		H	19.4	S
2009-11-23	4	C9		H	33	S
2009-11-23	4	C9		H	23	S
2009-11-23	4	C9		M	50.4	S
2009-11-23	4	C9		H	43.4	S
2009-11-23	4	C9		M	36.7	S
2009-11-23	4	C9		M	47.3	S
2009-11-23	4	C9		H	41	S
2009-11-23	4	C9		H	45	S
2009-11-23	4	C9		M	21.6	S
2009-11-23	4	C9		H	31.6	S
2009-11-23	4	C9		H	49.7	S
2009-11-23	4	C9		H	33.4	S
2009-11-23	4	C9		H	43.2	S
2009-11-23	4	C9		M	15	S
2009-11-23	4	C9		M	36.2	S
2009-11-23	4	C9		M	37.1	S
2009-11-23	4	C9		M	45.4	S
2009-11-23	4	C9		H	47	S
2009-11-23	4	C9		H	29.7	S
2009-11-23	4	C9		H	24.3	S
2009-11-23	4	C9		M	35.5	S
2009-11-23	4	C9		H	16.7	S
2009-11-23	4	C9		M	38.9	S
2009-11-23	4	C9		H	38.5	S
2009-11-23	4	C9		H	41.4	S
2009-11-23	4	C9		M	16.4	S
2009-11-23	4	C9		H	38.5	S
2009-11-23	4	C9		H	31.8	S
2009-11-23	4	C9		H	48.8	S
2009-11-23	4	C9		M	38.6	S
2009-11-23	4	C9		H	34.2	E
2009-11-23	4	C9		H	40.6	S
2009-11-23	4	C9		H	31	S
2009-11-23	4	C9		M	35.3	S
2009-11-23	4	C9		M	28.4	S
2009-11-23	4	C9		H	48.5	S
2009-11-23	4	C9		H	30.3	S
2009-11-23	4	C9		M	47	S
2009-11-23	4	C9		M	45.8	S
2009-11-23	4	C9		H	37	S
2009-11-23	4	C9		M	36.7	S
2009-11-23	4	C9		H	41	S
2009-11-23	4	C9		M	35.3	S
2009-11-23	4	C9		H	38.4	S
2009-11-23	4	C9		H	45.2	S
2009-11-23	4	C9		M	45.2	E
2009-11-23	4	C9		M	48	S
2009-11-23	4	C9		M	27.6	S
2009-11-23	4	C9		M	35.7	S
2009-11-23	4	C9		M	40.6	S
2009-11-23	4	C9		H	29.4	S
2009-11-23	4	C9		H	44	S
2009-11-23	4	C9		M	30	S
2009-11-23	4	C10		M	18	S
2009-11-23	4	C10		M	39.5	S
2009-11-23	4	C10		M	38	S
2009-11-23	4	C10		M	29.5	S
2009-11-23	4	C10		H	45	S
2009-11-23	4	C10		H	44	S
2009-11-23	4	C10		M	40	S
2009-11-23	4	C10		H	32	S
2009-11-23	4	C10		M	30	S
2009-11-23	4	C10		M	18.5	S
2009-11-23	4	C10		M	29	S
2009-11-23	4	C10		M	21	S
2009-11-23	4	C10		M	29	S
2009-11-23	4	C10		M	39	S
2009-11-23	4	C10		M	31.2	S
2009-11-23	4	C10		M	23.5	S
2009-11-23	4	C10		M	17	S
2009-11-23	4	C10		H	25.5	S
2009-11-23	4	C10		M	33.2	S
2009-11-23	4	C10		M	19.4	E
2009-11-23	4	C10		H	34.3	S
2009-11-23	4	C10		M	18	S
2009-11-23	4	C10		H	33	S
2009-11-23	4	C10		M	37	S
2009-11-23	4	C10		M	31	S
2009-11-23	4	C10		H	39	S
2009-11-23	4	C10		H	39.5	S
2009-11-23	4	C10		H	19	S
2009-11-23	4	C10		M	31	S
2009-11-23	4	C10		H	26	S
2009-11-23	4	C10		H	38	S
2009-11-23	4	C10		M	31.5	S
2009-11-23	4	C10		M	32	S
2009-11-23	4	C10		H	39	S
2009-11-23	4	C10		M	24	E
2009-11-23	4	C10		M	25	S
2009-11-23	4	C10		M	23	S
2009-11-23	4	C10		M	33	S
2009-11-23	4	C10		M	31	S
2009-11-23	4	C10		M	23	E
2009-11-23	4	C10		H	29	S
2009-11-23	4	C10		H	21	S
2009-11-23	4	C10		M	28	S
2009-11-23	4	C10		M	17	S
2009-11-23	4	C10		M	24	S
2009-11-23	4	C10		H	16	S
2009-11-23	4	C10		M	28.5	S
2009-11-23	4	C10		H	43.4	S
2009-11-23	4	C10		H	43.2	S
2009-11-23	4	C10		H	23.4	S
2009-11-23	4	C10		M	19	S
2009-11-23	4	C10		M	31.6	S
2009-11-23	4	C10		M	28.5	S
2009-11-23	4	C10		M	23.6	S
2009-11-23	4	C10		H	33	S
2009-11-23	4	C10		H	48.2	S
2009-11-23	4	C10		M	21	S
2009-11-23	4	C10		H	39.5	S
2009-11-23	4	C10		M	47	S
2009-11-23	4	C10		H	29	S
2009-11-23	4	C10		M	27.2	S
2009-11-23	4	C10		M	26.8	S
2009-11-23	4	C10		H	33	S
2009-11-23	4	C10		M	24.5	S
2009-11-23	4	C10		M	33	S
2009-11-23	4	C10		M	23.2	S
2009-11-23	4	C10		H	31	S
2009-11-23	4	C10		M	29	S
2009-11-23	4	C10		M	22.7	E
2009-11-23	4	C10		H	31.8	S
2009-11-23	4	C10		M	42	S
2009-11-23	4	C10		M	40.5	S
2009-11-23	4	C10		H	35	S
2010-03-23	4	C3		M	51.5	S
2010-03-23	4	C3		M	24.6	E
2010-03-23	4	C3		H	50.1	S
2010-03-23	4	C3		M	45.4	S
2010-03-23	4	C3		M	31.8	S
2010-03-23	4	C3		H	38	S
2010-03-23	4	C3		H	30	E
2010-03-23	4	C3		H	35.4	S
2010-03-23	4	C3		H	46.2	S
2010-03-23	4	C3		H	26.9	S
2010-03-23	4	C2		M	25.4	E
2010-03-23	4	C2		M	27.1	S
2010-03-23	4	C2		M	28.7	S
2010-03-23	4	C2		M	31.1	S
2010-03-23	4	C2		H	37.4	S
2010-03-23	4	C2		M	45	E
2010-03-23	4	C2		M	25.8	S
2010-03-23	4	C2		M	25.8	S
2010-03-23	4	C2		M	20.2	S
2010-03-23	4	C2		H	48.3	E
2010-03-23	4	C2		H	35.4	S
2010-03-23	4	C2		M	26.8	E
2010-03-23	4	C2		M	41.3	S
2010-03-23	4	C2		M	39.7	E
2010-03-23	4	C2		H	30.8	S
2010-03-23	4	C2		M	28.4	S
2010-03-23	4	C1		M	50.7	E
2010-03-23	4	C1		H	47.3	S
2010-03-23	4	C1		H	44.2	S
2010-03-23	4	C1		M	38.4	E
2010-03-23	4	C1		H	38.7	S
2010-03-23	4	C5		H	35.8	E
2010-03-23	4	C5		M	34	S
2010-03-23	4	C5		M	36.2	S
2010-03-23	4	C5		H	53.1	S
2010-03-23	4	C5		M	52	S
2010-03-23	4	C5		M	33	S
2010-03-23	4	C5		H	41	S
2010-03-23	4	C5		M	52.8	S
2010-03-23	4	C5		H	35.3	S
2010-03-23	4	C5		H	21	E
2010-03-23	4	C5		M	23.7	E
2010-03-23	4	C5		M	23.2	S
2010-03-23	4	C5		M	29.7	S
2010-03-23	4	C5		M	49	S
2010-03-23	4	C5		H	44.3	E
2010-03-23	4	C5		M	35.4	S
2010-03-23	4	C5		M	39.3	S
2010-03-23	4	C5		M	56	S
2010-03-23	4	C5		M	45	S
2010-03-23	4	C5		M	47	S
2010-03-23	4	C5		M	39.4	S
2010-03-23	4	C5		H	34.2	S
2010-03-23	4	C5		H	37.4	S
2010-03-23	4	C5		H	35.3	S
2010-03-23	4	C6		M	44	S
2010-03-23	4	C6		H	38	E
2010-03-23	4	C4		H	47.2	S
2010-03-23	4	C4		M	31	E
2010-03-23	4	C4		H	41	E
2010-03-23	4	C4		H	40.7	S
2010-03-23	4	C4		M	55.8	S
2010-03-23	4	C4		M	30.6	S
2010-03-23	4	C4		M	63.2	S
2010-03-23	4	C4		H	40.5	S
2010-03-23	4	C7		H	40	S
2010-03-23	4	C7		M	49	S
2010-03-23	4	C7		H	28.4	E
2010-03-23	4	C7		H	49.6	E
2010-03-23	4	C7		H	35.4	S
2010-03-23	4	C7		M	29.7	S
2010-03-23	4	C7		M	29.3	S
2010-03-23	4	C7		H	30.2	E
2010-03-23	4	C7		H	43.2	S
2010-03-23	4	C7		M	33.7	S
2010-03-23	4	C7		M	34.6	S
2010-03-23	4			M	48.6	E
2010-03-23	4	C10		H	33.7	E
2010-03-23	4	C10		M	53.5	S
2010-03-23	4	C10		M	34.6	E
2010-03-23	4	C10		M	45	S
2010-03-23	4	C10		M	57.6	S
2010-03-23	4	C10		M	54	S
2010-03-23	4	C10		M	41.8	S
2010-03-23	4	C10		M	51.7	S
2010-03-23	4	C10		H	40.7	S
2010-03-23	4	C10		M	56.5	S
2010-03-23	4	C10		H	30.3	S
2010-03-23	4	C10		M	22.3	S
2010-03-23	4	C10		M	31.2	E
2010-03-23	4	C10		H	29	E
2010-03-23	4	C10		H	42.3	S
2010-03-23	4	C10		H	24	S
2010-03-23	4	C10		H	50	S
2010-03-23	4	C10		H	36.4	S
2010-03-23	4	C9		H	39.7	S
2010-03-23	4	C9		M	42	S
2010-03-23	4	C9		H	52	S
2010-03-23	4	C9		M	28	S
2010-03-23	4	C9		H	42	S
2010-03-23	4	C9		M	34.4	S
2010-03-23	4	C9		H	32.6	S
2010-03-23	4	C9		H	38	E
2010-03-23	4	C9		H	36.3	S
2010-03-23	4	C9		M	23	S
2010-03-23	4	C9		M	52.8	S
2010-03-23	4	C9		H	46.3	S
2010-03-23	4	C9		M	53.6	S
2010-03-23	4	C9		H	31.3	E
2010-03-23	4	C9		H	30.7	S
2010-03-23	4	C9		M	49.6	S
2010-03-23	4	C9		M	36.2	E
2010-03-23	4	C9		H	55	S
2010-03-23	4	C9		H	37	S
2010-03-23	4	C9		M	31.3	S
2010-03-23	4	C9		H	46.4	E
2010-03-23	4	C8		M	40.8	S
2010-03-23	4	C8		M	43.5	S
2010-03-23	4	C8		M	36	E
2010-03-23	4	C8		H	46	E
2010-03-23	4	C8		M	31	S
2010-03-23	4	C8		H	33.5	S
2010-03-23	4	C8		M	58.2	S
2010-03-23	4	C8		M	47	S
2010-03-23	4	C8		H	35.6	S
2010-03-23	4	C8		M	28.4	S
2010-03-23	4	C8		H	50.5	S
2010-03-23	4	C8		M	44	E
2010-03-23	4	C8		M	46.4	S
2010-03-23	4	C8		M	51	S
2010-03-23	4	C8		H	28.4	S
2010-03-23	4	C8		H	36.3	S
2010-03-23	4	C8		M	44.3	S
2010-03-23	4	C8		M	36.7	S
2010-03-23	4	C8		H	40.5	S
2010-06-17	4	C3		M	37.1	E
2010-06-17	4	C2		M	28.4	S
2010-06-17	4	C2		M	37.6	S
2010-06-17	4	C2		M	35	E
2010-06-17	4	C2		M	33.6	S
2010-06-17	4	C4		M	42	E
2010-06-17	4	C5		H	42.7	E
2010-06-17	4	C9		H	21	S
2010-06-17	4	C9		M	33.4	S
2010-06-17	4	C10		M	47.3	S
2010-06-17	4	C10		H	32	E
2010-06-17	4	C10		M	38	E
2010-06-17	4	C10		M	45.6	S
2010-06-17	4	C10		M	36.7	S
2010-06-17	4	C10		H	41.5	S
2010-06-17	4	C10		H	28.7	E
2010-06-17	4	C10		H	49.3	S
2010-06-17	4	C8		M	36.3	S
2010-06-17	4	C8		H	40.5	E
2010-06-17	4	C7		M	44	S
2010-06-17	4	C7		M	42.7	S
2010-06-17	4	C7		H	47.3	S
2010-06-17	4	C7		H	47.5	S
2010-06-17	4	C7		M	46	S
2010-06-17	4	C7		M	49.2	S
2010-06-17	4	C7		M	44	S
2010-06-17	4	C7		H	47.2	S
2010-06-17	4	C7		M	41.8	S
2010-06-17	4	C7		M	38.6	S
2010-06-17	4	C7		M	47	S
2010-06-17	4	C7		H	40.5	S
2010-06-17	4	C7		M	53.6	S
2010-06-17	4	C7		H	41	S
2010-06-17	4	C7		H	28.7	S
2010-06-17	4	C7		M	48	S
2010-06-17	4	C7		M	39	S
2010-06-17	4	C7		M	34.7	S
2010-06-17	4	C7		M	24.3	S
2010-06-17	4	C7		H	47.4	S
2010-06-17	4			M	57	S
2010-09-06	4	C3		M	23.5	S
2010-09-06	4	C3		M	20.9	S
2010-09-06	4	C3		M	23.6	S
2010-09-06	4	C3		M	23.3	S
2010-09-06	4	C3		M	25.4	S
2010-09-06	4	C3		M	23.2	S
2010-09-06	4	C3		M	29.6	S
2010-09-06	4	C2		H	57.9	S
2010-09-06	4	C2		M	22.2	S
2010-09-06	4	C2		H	39.5	S
2010-09-06	4	C2		M	38	S
2010-09-06	4	C1		H	35	E
2010-09-06	4	C1		M	23.9	S
2010-09-06	4	C1		M	24.6	S
2010-09-06	4	C1		M	26.4	S
2010-09-06	4	C1		H	22.4	S
2010-09-06	4	C1		M	17	S
2010-09-06	4	C1		M	23	S
2010-09-06	4	C1		M	25.8	S
2010-09-06	4	C1		M	37.4	S
2010-09-06	4	C1		M	22.4	S
2010-09-06	4	C1		H	58.1	S
2010-09-06	4	C1		M	53	S
2010-09-06	4	C1		M	24.5	S
2010-09-06	4	C1		M	22	S
2010-09-06	4	C1		M	58.5	S
2010-09-06	4	C1		H	39.9	S
2010-09-06	4	C1		M	31.7	S
2010-09-06	4	C1		H	33.7	S
2010-09-06	4	C1		H	35.5	S
2010-09-06	4	C1		M	36.3	S
2010-09-06	4	C1		H	49.5	S
2010-09-06	4	C1		M	49.9	S
2010-09-06	4	C4		M	43.5	S
2010-09-06	4	C4		M	40	S
2010-09-06	4	C4		M	51.3	S
2010-09-06	4	C4		H	33	S
2010-09-06	4	C4		H	23.5	E
2010-09-06	4	C5		M	17.9	S
2010-09-06	4	C5		M	20	S
2010-09-06	4	C5		M	24	S
2010-09-06	4	C5		H	39	E
2010-09-06	4			M	50-55	S
2010-09-06	4	C6		M	38.6	E
2010-09-06	4	C8		H	24.4	S
2010-09-06	4	C8		M	25.3	S
2010-09-06	4	C8		H	48	E
2010-09-06	4	C8		M	19	S
2010-09-06	4	C8		H	22.7	S
2010-09-06	4	C8		M	20	S
2010-09-06	4	C8		H	18.7	S
2010-09-06	4	C8		H	31.5	S
2010-09-06	4	C8		H	24.2	S
2010-09-06	4	C9		M	24.7	S
2010-09-06	4	C9		H	45.3	S
2010-09-06	4	C9		M	23.7	S
2010-09-06	4	C9		M	38.7	S
2010-09-06	4	C9		M	44	S
2010-09-06	4	C9		H	26.8	S
2010-09-06	4	C9		H	44	S
2010-09-06	4	C9		H	51	S
2010-09-06	4	C9		H	42.9	S
2010-09-06	4	C9		H	34.8	S
2010-09-06	4	C10		M	24.8	S
2010-09-06	4	C10		M	23.2	S
2010-09-06	4	C10		M	38	E
2010-09-06	4	C10		M	37.9	S
2010-12-09	4	C3		M	36	E
2010-12-09	4	C3		M	45.9	S
2010-12-09	4	C3		H	39.2	S
2010-12-09	4	C3		M	32.1	S
2010-12-09	4	C3		H	49	S
2010-12-09	4	C3		M	36.5	S
2010-12-09	4	C3		M	40.2	S
2010-12-09	4	C3		M	40.1	E
2010-12-09	4	C3		M	43.5	S
2010-12-09	4	C3		M	23.9	E
2010-12-09	4	C3		M	46.7	S
2010-12-09	4	C3		M	36.1	S
2010-12-09	4	C3		M	42.6	S
2010-12-09	4	C3		M	40	S
2010-12-09	4	C3		M	40.5	S
2010-12-09	4	C3		M	38	S
2010-12-09	4	C3		H	41	E
2010-12-09	4	C3		M	48.5	S
2010-12-09	4	C3		H	30.6	S
2010-12-09	4	C3		M	48.9	S
2010-12-09	4	C3		M	39.8	S
2010-12-09	4	C2		M	21	S
2010-12-09	4	C2		H	29.9	S
2010-12-09	4	C2		M	26.3	S
2010-12-09	4	C2		M	29.6	E
2010-12-09	4	C2		M	39.9	S
2010-12-09	4	C2		M	48.9	S
2010-12-09	4	C2		H	44	S
2010-12-09	4	C2		M	45.5	S
2010-12-09	4	C2		H	41.7	S
2010-12-09	4	C2		H	33	S
2010-12-09	4	C2		H	38.5	S
2010-12-09	4	C2		M	34	S
2010-12-09	4	C2		M	43.2	S
2010-12-09	4	C2		H	22.8	S
2010-12-09	4	C2		M	36.1	E
2010-12-09	4	C2		H	26.9	S
2010-12-09	4	C2		M	34	S
2010-12-09	4	C2		M	33.5	S
2010-12-09	4	C2		H	19	S
2010-12-09	4	C2		H	43.9	S
2010-12-09	4	C2		M	25	S
2010-12-09	4	C2		H	16.9	S
2010-12-09	4	C2		H	32	S
2010-12-09	4	C2		M	26.5	S
2010-12-09	4	C2		M	24.2	S
2010-12-09	4	C2		M	25.3	E
2010-12-09	4	C1		M	37.5	S
2010-12-09	4	C1		H	36.4	S
2010-12-09	4	C1		M	33.9	S
2010-12-09	4	C1		H	46.3	S
2010-12-09	4	C1		M	38	S
2010-12-09	4	C1		M	43	S
2010-12-09	4	C1		M	34.9	S
2010-12-09	4	C1		M	40.3	S
2010-12-09	4	C1		M	33.1	E
2010-12-09	4	C1		H	29	E
2010-12-09	4	C1		M	33.5	S
2010-12-09	4	C1		M	28	S
2010-12-09	4	C1		M	38.6	S
2010-12-09	4	C1		H	22	S
2010-12-09	4	C1		M	37	S
2010-12-09	4	C1		H	40	S
2010-12-09	4	C1		M	30	E
2010-12-09	4	C1		M	37	S
2010-12-09	4	C1		M	29	S
2010-12-09	4	C1		H	32.3	S
2010-12-09	4	C4		H	24.3	E
2010-12-09	4	C4		M	27.8	E
2010-12-09	4	C4		H	29.2	E
2010-12-09	4	C4		M	28.5	S
2010-12-09	4	C4		H	25.3	S
2010-12-09	4	C5		M	32.5	E
2010-12-09	4	C5		H	20.3	S
2010-12-09	4	C5		M	32	E
2010-12-09	4	C5		M	44	S
2010-12-09	4	C5		M	34.3	S
2010-12-09	4	C5		H	40	S
2010-12-09	4	C5		M	27	S
2010-12-09	4	C6		M	23.2	S
2010-12-09	4	C6		M	20.6	S
2010-12-09	4	C6		M	33.2	S
2010-12-09	4	C6		M	34.2	S
2010-12-09	4	C6		H	33.7	S
2010-12-09	4	C6		M	26.7	E
2010-12-09	4	C6		H	36	S
2010-12-09	4	C6		M	46.5	S
2010-12-09	4	C6		M	41.3	S
2010-12-09	4	C6		M	34.2	S
2010-12-09	4	C6		H	31	S
2010-12-09	4	C6		H	29	S
2010-12-09	4	C6		H	34.7	S
2010-12-09	4	C6		H	37.3	S
2010-12-09	4	C6		M	35.6	S
2010-12-09	4	C6		H	29.6	S
2010-12-09	4	7.3		M	35	S
2010-12-09	4	7.3		H	35.6	S
2010-12-09	4	C7		M	30	E
2010-12-09	4	C7		H	37.6	E
2010-12-09	4	C7		M	39.5	S
2010-12-09	4	C7		M	33.7	S
2010-12-09	4	C8		H	26.8	E
2010-12-09	4	C8		H	31.2	E
2010-12-09	4	C9		M	41	S
2010-12-09	4	C9		H	48.7	S
2010-12-09	4	C9		M	47.5	S
2010-12-09	4	C9		H	22	E
2010-12-09	4	C9		M	35.3	S
2010-12-09	4	C9		M	37	E
2010-12-09	4	C9		H	39.7	S
2010-12-09	4	C9		H	38.9	S
2010-12-09	4	C9		M	27	E
2010-12-09	4	C9		M	35.6	S
2010-12-09	4	C9		H	40	S
2010-12-09	4	C10		H	24.6	E
2010-12-09	4	C10		M	31.7	E
2010-12-09	4	C10		H	29.7	S
2010-12-09	4	C10		H	35.7	S
2010-12-09	4	C10		H	36	S
2010-12-09	4	C10		M	35	S
2010-12-09	4	C10		M	24.8	E
2010-12-09	4	C10		H	30	S
2010-12-09	4	C10		M	34.7	E
2010-12-09	4	C10		H	31.8	S
2010-12-09	4	C10		H	26.3	S
2010-12-09	4	C10		H	40.7	S
2010-12-09	4	C10		H	24.3	S
2010-12-09	4	C10		H	34	S
2010-12-09	4	C10		M	31	S
2010-12-09	4	C10		M	39.2	S
2010-12-09	4	C10		M	40.5	S
2010-12-09	4	C10		M	38.2	E
2010-12-09	4	C10		M	24.9	S
2010-12-09	4	C10		M	43	S
2010-12-09	4	C10		M	41.4	S
2011-03-03	4	C3		M	12.5	S
2011-03-03	4	C3		H	16	S
2011-03-03	4	C3		H	44.1	S
2011-03-03	4	C2		H	42	S
2011-03-03	4	C2		H	35.2	E
2011-03-03	4	C2		H	45.1	S
2011-03-03	4	C2		M	47	S
2011-03-03	4	C2		H	35.2	S
2011-03-03	4	C2		M	33.1	S
2011-03-03	4	C2		H	40.9	S
2011-03-03	4	C2		M	34	S
2011-03-03	4	C2		H	43.4	S
2011-03-03	4	C2		M	38	S
2011-03-03	4	C2		M	44.7	S
2011-03-03	4	C2		H	45	S
2011-03-03	4	C2		M	39.9	E
2011-03-03	4	C2		H	44.5	S
2011-03-03	4	C2		H	41.6	S
2011-03-03	4	C2		M	39	S
2011-03-03	4	C2		H	25	S
2011-03-03	4	C1		H	33	S
2011-03-03	4	C1		M	17	E
2011-03-03	4	C5		H	32.9	E
2011-03-03	4	5.101	3	M	39.5	S
2011-03-03	4	5.101	3	H	19.5	S
2011-03-03	4	5.101	3	H	27.9	S
2011-03-03	4	5.101	3	H	20	S
2011-03-03	4	C4		M	48.5	S
2011-03-03	4	C8		M	18.6	S
2011-03-03	4	C8		U	15-20	S
2011-03-03	4	C8		M	13.4	E
2011-03-03	4	C8		H	34.7	S
2011-03-03	4	C8		M	42.7	S
2011-03-03	4	C8		H	38.2	S
2011-03-03	4	C8		M	48.7	S
2011-03-03	4	C8		M	39.5	S
2011-03-03	4	C8		H	49.7	S
2011-03-03	4	C8		M	50.6	S
2011-03-03	4	C8		H	39.4	S
2011-03-03	4	C8		M	38.7	S
2011-03-03	4	C8		M	42	S
2011-03-03	4	C8		M	30.2	S
2011-03-03	4	C8		H	36.9	S
2011-03-03	4	C8		M	29	S
2011-03-03	4	C8		H	46	S
2011-03-03	4	C8		H	42.8	S
2011-03-03	4	C7		M	12	S
2011-03-03	4	C7		H	27.9	E
2011-03-03	4	C7		H	35.7	E
2011-03-03	4	C9		M	23.4	E
2011-03-03	4	C9		H	19.6	S
2011-03-03	4	C9		H	32.6	E
2011-03-03	4	C9		M	20.4	S
2011-03-03	4	C9		M	25.3	S
2011-03-03	4	C10		H	37.8	E
2011-05-30	4	C3		H	49.4	S
2011-05-30	4	C3		M	52.1	S
2011-05-30	4	C3		H	53	S
2011-05-30	4	C2		M	39.4	E
2011-05-30	4	C1		M	21.6	E
2011-05-30	4	C1		M	38	E
2011-05-30	4	C1		H	40	E
2011-05-30	4	C5		H	63.2	S
2011-05-30	4	C5		M	47.1	S
2011-05-30	4	C5		H	36.4	S
2011-03-03	4	C5		H	52	E
2011-05-30	4	C5		M	54	S
2011-05-30	4	C5		H	48.2	S
2011-05-30	4	C5		M	46.4	S
2011-05-30	4	C5		H	33.6	S
2011-05-30	4	C5		H	43	S
2011-05-30	4	C5		H	42.8	S
2011-05-30	4	C5		M	27.4	S
2011-05-30	4	C4		H	51.2	S
2011-05-30	4	C4		H	58.6	S
2011-05-30	4	C4		M	42.5	S
2011-05-30	4	C4		H	35.1	S
2011-03-03	4	C6		H	14.6	S
2011-05-30	4	C6		M	15	S
2011-05-30	4	C7		H	34.7	E
2011-05-30	4	C7		H	33.6	S
2011-05-30	4	C7		M	27	S
2011-05-30	4	C7		H	27.6	S
[truncated: 3,684 more rows]

## Sheet: Control sites Stage A
Sampling date	Site No.	No. of casita or line	Crevice size	Lobster sex	Lobster size	Condition
2009-11-03	1	1.11	2	M	23.5	S
2009-11-03	1	1.11	2	H	32.5	S
2009-11-03	1	1.11	2	H	17	S
2009-11-03	1	1.21	1	M	24.1	S
2009-11-03	1	1.21	1	M	13	S
2009-11-03	1	3.2	2	H	29	S
2009-11-03	1	4.4	1	M	16.8	S
2009-11-03	1	4.51	2	H	26.9	S
2009-11-03	1	4.51	2	M	20.9	S
2009-11-03	1	4.51	2	H	22	S
2009-11-03	1	4.51	2	M	21.6	S
2009-11-03	1	4.51	2	H	23.4	S
2009-11-03	1	4.51	2	H	17.5	S
2009-11-03	1	4.51	2	U	16.9	S
2009-11-03	1	6.41	3	M	32.5	S
2009-11-03	1	6.41	3	H	42.5	S
2009-11-03	1	6.41	3	M	22.6	S
2009-11-03	1	7.1	3	M	18	S
2009-11-03	1	7.51	1	M	23	S
2009-11-03	1	7.52	2	H	42	S
2009-11-03	1	7.53	3	U	13	S
2009-11-03	1	7.53	3	H	47.5	S
2009-11-03	1	7.53	3	M	36	S
2009-11-03	1	7.53	3	M	32	S
2009-11-03	1	7.53	3	H	24.7	S
2009-11-03	1	8.5	1	M	22.3	S
2009-11-03	1	10.51	3	M	38.3	S
2009-11-03	1	10.51	3	M	39	S
2009-11-03	1	10.51	3	M	42.3	S
2009-11-03	1	10.3	1	M	22.5	S
2009-11-03	1	9.21	1	M	24	S
2009-11-03	1	9.21	1	M	27.3	S
2009-11-03	1	9.22	2	U	22.1	S
2010-03-16	1	1.11	2	M	21	S
2010-03-16	1	1.11	2	H	21.4	S
2010-03-16	1	3.11	2	M	19	S
2010-03-16	1	3.11	2	M	18.7	S
2010-03-16	1	3.11	2	M	13.6	S
2010-03-16	1	3.11	2	M	12	S
2010-03-16	1	3.9	2	H	16	S
2010-03-16	1	4.101	3	U	16.3	E
2010-03-16	1	4.101	3	M	15.7	S
2010-03-16	1	4.61	3	M	37.5	S
2010-03-16	1	4.61	3	M	18.3	S
2010-03-16	1	5.7	3	H	12	S
2010-03-16	1	5.91	3	H	29	S
2010-03-16	1	5.91	3	M	34	S
2010-03-16	1	7.11	3	M	24	E
2010-03-16	1	7.11	3	U	14	E
2010-03-16	1	7.2	1	M	17.5	S
2010-03-16	1	9.81	3	U	8	S
2010-03-16	1	9.81	3	M	19.8	S
2010-03-16	1	9.7	3	M	22.5	E
2010-03-16	1	10.3	3	M	28.5	S
2010-03-16	1	10.8	2	M	21.4	E
2010-03-16	1	10.1	2	H	26	E
2010-06-23	1	1.1	3	H	23.2	E
2010-06-23	1	3.6	2	M	14.8	S
2010-06-23	1	4.71	2	M	22	E
2010-06-23	1	4.71	2	M	26.7	S
2010-06-23	1	4.71	2	M	15.4	S
2010-06-23	1	5.11	2	M	14.6	S
2010-06-23	1	5.11	2	M	15.5	S
2010-06-23	1	5.1	3	M	16	E
2010-06-23	1	6.101	3	M	24	S
2010-06-23	1	6.101	3	M	18.6	S
2010-06-23	1	7.9	2	M	22	S
2010-06-23	1	8.1	3	H	35	E
2010-10-01	1	1.1	2	M	21.6	E
2010-10-01	1	2.2	2	M	25	S
2010-10-01	1	4.11	3	M	17.5	E
2010-10-01	1	4.11	3	H	20.3	S
2010-10-01	1	4.11	3	M	23.4	S
2010-10-01	1	6.61	3	M	21.4	S
2010-10-01	1	6.62	3	H	31.5	S
2010-10-01	1	7.71	3	M	13.4	S
2010-10-01	1	7.71	3	M	18	S
2010-10-01	1	8.9	3	H	28	S
2010-10-01	1	9.9	2	M	20.8	E
2010-10-01	1	10.1	1	H	22	S
2010-10-01	1	10.7	3	H	24.7	E
2010-10-01	1	10.6	2	M	30.8	E
2010-10-01	1	10.5	2	M	27	E
2010-12-06	1	3.1	2	M	17.2	S
2010-12-06	1	5.1	2	M	13.6	S
2010-12-06	1	5.1	2	U	6.7	S
2010-12-06	1	7.9	2	H	21.7	S
2010-12-06	1	7.9	3	M	19.4	S
2010-12-06	1	8.1	3	H	25.7	E
2010-12-06	1	9.4	2	H	22.5	S
2010-12-06	1	10.5	1	U	9.7	S
2010-12-06	1	10.51	3	H	35.7	S
2010-12-06	1	10.7	3	M	20	S
2011-02-25	1	3.8	1	M	14.5	S
2011-02-25	1	3.91	2	M	20.5	S
2011-02-25	1	3.91	2	M	12	S
2011-02-25	1	5.101	3	M	18.5	S
2011-02-25	1	5.101	3	U	11.5	S
2011-02-25	1	9.1	2	M	15.6	E
2011-05-24	1	3.1	3	H	31.9	S
2011-05-24	1	4.5	2	H	18	S
2011-05-24	1	5.4	3	M	17	S
2011-05-24	1	9.1	2	H	25.4	E
2011-05-24	1	9.51	2	M	22	S
2011-05-24	1	9.51	2	M	11.4	S
2011-05-24	1	10.6	3	M	16.2	E
2011-09-22	1	1.71	3	M	19.5	S
2011-09-22	1	1.71	3	M	21	S
2011-09-22	1	3.1	2	H	15.1	E
2011-09-22	1	4.41	2	M	18.5	S
2011-09-22	1	4.41	2	M	16.1	S
2011-09-22	1	4.4	3	M	22	E
2011-09-22	1	4.1	3	H	14.2	E
2011-09-22	1	7.8	2	M	22.7	S
2011-09-22	1	8.91	3	H	21.9	S
2011-09-22	1	8.91	3	M	19.2	E
2011-09-22	1	9.9	2	M	13.4	E
2011-09-22	1	10.6	3	M	14.5	E
2011-09-22	1	10.21	2	H	30.4	S
2011-09-22	1	10.21	2	M	19.3	S
2012-01-18	1	2.2	3	H	14.5	E
2012-01-18	1	3.6	2	M	12.5	E
2012-01-18	1	3.1	3	U	12.5	E
2012-01-18	1	5.4	1	H	15	S
2012-01-18	1	6.61	3	H	25.7	S
2012-01-18	1	6.61	3	H	34	S
2012-01-18	1	7.9	1	M	13	S
2012-01-18	1	7.9	1	U	19.2	S
2012-01-18	1	9.1	2	H	16.7	S
2012-01-18	1	9.1	2	U	9.5	S
2012-01-18	1	10.9	3	M	15.7	S
2012-01-18	1	10.7	3	M	18	S
2012-01-18	1	10.62	2	M	27.4	S
2012-01-18	1	10.4	3	M	26.3	S
2012-04-20	1	1.1	3	M	14.1	S
2012-04-20	1	2.2	3	H	17.4	E
2012-04-20	1	3.9	1	M	13.7	E
2012-04-20	1	3.1	2	H	13.8	E
2012-04-20	1	4.5	3	M	15.5	S
2012-04-20	1	4.5	3	H	17.2	S
2012-04-20	1	4.1	3	M	10.9	S
2012-04-20	1	4.1	3	H	16.7	S
2012-04-20	1	4.1	3	M	18.3	S
2012-04-20	1	4.1	3	M	15.5	S
2012-04-20	1	4.1	3	M	14.5	E
2012-04-20	1	10.6	2	M	26.7	S
2012-04-20	1	10.6	2	H	25	S
2012-04-20	1	10.6	2	H	20.8	S
2012-09-05	1	9.1	2	M	35.7	S
2012-09-05	1	10.4	2	M	19	S
2012-09-05	1	10.62	2	M	23.6	S
2012-09-05	1	10.71	3	M	30.5	S
2012-09-05	1	10.71	3	U	7	S
2009-11-19	3	9.43	3	M	42	S
2009-11-19	3	9.44	3	H	23	S
2010-02-25	3	9.42	3	M	52.7	S
2010-09-02	3	10.7	1	H	23.2	S
2010-09-02	3	10.8	3	M	23	E
2010-09-02	3	9.8	1	M	25.6	S
2010-09-02	3	9.81	2	H	20	S
2010-09-02	3	9.81	2	H	40.2	S
2010-09-02	3	9.81	3	H	34.5	S
2010-09-02	3	8.7	3	H	42.6	S
2010-12-07	3	8.61	3	H	22.3	S
2010-12-07	3	8.61	3	H	31.6	S
2010-12-07	3	9.8	2	H	29.5	E
2010-12-07	3	9.82	3	H	37.8	S
2010-12-07	3	9.83	3	H	31.7	S
2010-12-07	3	9.91	3	M	40	S
2010-12-07	3	9.91	3	M	32.4	S
2010-12-07	3	9.91	3	H	38.3	S
2010-12-07	3	9.92	3	H	33	S
2010-12-07	3	9.92	3	M	19.8	S
2010-12-07	3	9.92	3	H	28.3	S
2011-02-23	3	8.6	3	H	30	S
2011-02-23	3	9.82	3	M	46.8	S
2011-02-23	3	9.84	3	M	15.6	S
2011-02-23	3	10.7	3	M	15.7	S
2011-05-25	3	9.83	3	M	52.3	S
2011-05-25	3	9.83	3	H	49	S
2011-05-25	3	9.84	3	H	58.7	S
2011-09-23	3	8.51	3	H	24.3	S
2011-09-23	3	8.51	3	H	21.7	S
2011-09-23	3	8.42	1	M	16.2	S
2011-09-23	3	9.72	3	H	28.8	S
2012-01-19	3	5.9	1	M	15	S
2012-01-19	3	9.81	3	M	41.3	S
2012-01-19	3	9.81	3	H	17.4	S
2012-01-19	3	9.81	3	H	31.6	S
2012-01-19	3	9.82	3	M	18.5	E
2012-01-19	3	9.82	3	M	42.8	S
2012-01-19	3	9.82	3	M	29.6	S
2012-01-19	3	9.82	3	H	33	S
2012-01-19	3	10.7	3	M	15.2	S
2012-01-19	3	10.7	3	M	19.7	S
2012-04-23	3	9.6	1	M	21.3	E
2012-04-23	3	9.72	3	H	29	S
2012-04-23	3	9.81	3	M	24	S
2012-04-23	3	10.7	3	M	21.5	S
2012-09-04	3	9.72	3	M	20.6	S
2012-09-04	3	9.73	3	H	21.6	S
2012-09-04	3	9.72	3	H	26	S
2012-09-04	3	9.72	3	H	31.9	S
2009-11-20	6	2.3	1	U	7	S
2009-11-20	6	2.21	3	M	25	S
2009-11-20	6	2.21	3	M	15	S
2009-11-20	6	2.22	3	M	23.5	S
2009-11-20	6	6.51	3	M	15.5	S
2009-11-20	6	6.51	3	M	14.6	S
2009-11-20	6	6.51	3	H	22.7	S
2010-03-04	6	1.41	2	U	11	S
2010-03-04	6	6.21	3	M	19.5	S
2010-03-04	6	6.21	3	M	16.4	S
2010-03-04	6	6.21	3	M	27.3	S
2010-03-04	6	6.21	3	H	22.6	S
2010-03-04	6	6.5	3	M	29.2	S
2010-03-04	6	9.3	2	M	11.3	S
2010-03-04	6	9.11	3	H	41.4	S
2010-03-04	6	9.11	3	M	18.5	S
2010-03-04	6	9.11	3	H	24	S
2010-06-08	6	2.4	2	M	19	E
2010-06-08	6	2.4	1	U	10	E
2010-06-08	6	2.31	2	M	17.6	S
2010-06-08	6	3.51	3	M	22.3	S
2010-06-08	6	3.51	3	M	17	S
2010-06-08	6	4.8	1	M	9.3	S
2010-06-08	6	6.3	3	H	24.5	E
2010-06-08	6	9.21	3	M	17.6	S
2010-06-08	6	9.21	3	H	16.4	S
2010-06-08	6	9.21	3	M	19	S
2010-06-08	6	9.21	3	M	22.7	S
2010-06-08	6	9.21	3	H	21	S
2010-06-08	6	9.21	3	M	18.4	S
2010-09-13	6	2.7	2	M	26.1	S
2010-09-13	6	2.31	3	M	23	S
2010-09-13	6	2.31	3	M	24	S
2010-09-13	6	5.2	1	M	15	S
2010-09-13	6	5.81	3	M	24	S
2010-09-13	6	5.81	3	H	26	S
2010-09-13	6	5.81	3	M	24.2	S
2010-09-13	6	6.3	3	M	19.3	E
2010-09-13	6	7.71	2	H	18.9	S
2010-09-13	6	8.101	3	M	17	E
2010-09-13	6	8.91	3	H	32.5	S
2010-09-13	6	8.91	3	M	37.6	S
2010-09-13	6	8.81	3	M	17.4	S
2010-09-13	6	8.82	3	M	38	S
2010-09-13	6	10.91	2	U	12	S
2010-09-13	6	10.91	1	M	13	S
2010-12-16	6	2.31	2	M	15.6	S
2010-12-16	6	4.101	2	H	30.8	S
2010-12-16	6	4.101	2	M?	12	S
2010-12-16	6	5.8	3	M	41.6	S
2010-12-16	6	10.102	2	M	17.2	S
2010-12-16	6	10.102	2	M	24.8	S
2011-03-10	6	2.41	3	H	34	S
2011-03-10	6	2.41	3	M	16	S
2011-03-10	6	3.5	3	M	17	S
2011-03-10	6	5.81	3	H	33	E
2011-03-10	6	5.81	3	M	22	S
2011-03-10	6	8.67	1	M	12.4	S
2011-03-10	6	9.1	3	M	21.3	S
2011-06-07	6	2.1	1	U	12	S
2011-06-07	6	2.82	2	M	15	S
2011-06-07	6	2.51	2	H	20.5	S
2011-06-07	6	2.51	2	M	14	E
2011-06-07	6	2.51	2	H	13	S
2011-06-07	6	2.51	2	H	43.5	S
2011-06-07	6	2.51	2	M	15.1	S
2011-06-07	6	5.8	3	H	32.5	S
2011-06-07	6	10.101	2	M	14.6	S
2011-09-26	6	1.61	1	M	22	S
2011-09-26	6	1.101	3	M	30	S
2011-09-26	6	1.101	3	U	12	S
2011-09-26	6	1.101	3	M	23	S
2011-09-26	6	1.101	3	U	12	S
2011-09-26	6	1.101	3	U	11.1	S
2011-09-26	6	2.81	3	M	18.3	S
2011-09-26	6	2.81	3	M	23.5	S
2011-09-26	6	3.31	2	H	27.9	S
2011-09-26	6	5.81	3	M	22.2	S
2011-09-26	6	5.81	3	H	37.1	S
2011-09-26	6	5.81	3	H	20.9	S
2011-09-26	6	5.81	3	M	21	S
2011-09-26	6	5.81	3	H	26	S
2011-09-26	6	5.81	3	H	35.8	S
2011-09-26	6	8.8	3	H	37	S
2011-09-26	6	9.21	3	H	26.1	S
2011-09-26	6	9.21	3	U	15	E
2011-09-26	6	10.9	2	M	20.1	S
2012-01-26	6	2.1	3	M	16	S
2012-01-26	6	2.1	3	H	13.5	S
2012-01-26	6	2.8	2	H	20.5	S
2012-01-26	6	2.81	3	H	26	S
2012-01-26	6	2.81	3	M	20.2	S
2012-01-26	6	2.4	3	M	16.5	S
2012-01-26	6	2.4	3	H	11.5	S
2012-01-26	6	4.5	3	M	16	S
2012-01-26	6	4.5	3	H	16.9	S
2012-01-26	6	4.5	3	U	20	S
2012-01-26	6	4.5	3	U	20	S
2012-01-26	6	5.78	1	U	17	S
2012-01-26	6	5.9	3	M	31	S
2012-01-26	6	5.9	3	M	37	S
2012-01-26	6	5.9	3	H	23	S
2012-01-26	6	5.9	3	H	23.2	S
2012-01-26	6	6.3	3	M	14.6	E
2012-01-26	6	8.82	3	M	30.5	S
2012-01-26	6	8.82	3	H	21	S
2012-01-26	6	8.82	3	M	36.7	S
2012-01-26	6	8.82	3	H	27.5	S
2012-01-26	6	9.103	2	M	27	S
2012-01-26	6	10.9	2	M	17.5	S
2012-05-03	6	2.81	2	H	37.5	S
2012-05-03	6	2.81	2	M	28.3	S
2012-05-03	6	2.81	2	H	24.1	S
2012-05-03	6	2.81	2	M	19.1	S
2012-05-03	6	2.81	2	H	19.2	S
2012-05-03	6	2.82	3	M	19.8	S
2012-05-03	6	2.82	3	U	15	S
2012-05-03	6	4.42	2	M	31.4	S
2012-05-03	6	5.81	3	H	16	E
2012-05-03	6	5.81	3	M	12.8	S
2012-05-03	6	6.91	3	H	41.6	S
2012-05-03	6	6.91	3	M	20	S
2012-05-03	6	8.101	3	H	21.5	S
2012-05-03	6	8.101	3	M	23	S
2012-05-03	6	8.101	3	M	15.7	S
2012-05-03	6	8.101	3	H	41.6	S
2012-05-03	6	8.101	3	H	31.7	S
2012-05-03	6	8.91	3	H	27	S
2012-05-03	6	8.91	3	H	25.2	S
2012-05-03	6	8.81	3	H	20	S
2012-05-03	6	8.81	3	M	17.4	S
2012-05-03	6	8.2	3	H	20.7	S
2012-09-18	6	2.81	3	M	19.2	S
2012-09-18	6	1.102	3	M	22	S
2012-09-18	6	1.101	3	M	25	S
2012-09-18	6	5.81	3	M	26	S
2012-09-18	6	2.81	3	M	27.4	S
2012-09-18	6	5.81	3	U	30	S
2012-09-18	6	8.91	3	H	33.9	S
2012-09-18	6	8.8	3	M	35	S
2009-11-19	9	1.5	3	U	22.5	E
2009-11-19	9	6.1	1	M	21.6	S
2009-11-19	9	8.21	3	U	10.6	S
2009-11-19	9	8.21	3	M	15	S
2009-11-19	9	8.21	3	M	15.7	S
2009-11-19	9	8.21	3	M	42	S
2009-11-19	9	8.21	3	M	41.3	S
2009-11-19	9	9.51	3	M	17.5	S
2009-11-19	9	9.51	3	H	19.4	S
2009-11-19	9	9.51	3	M	14.2	S
2010-02-22	9	1.11	3	M	17	E
2010-02-22	9	1.11	3	M	25	S
2010-02-22	9	1.51	3	H	32.4	S
2010-02-22	9	1.51	3	H	15.1	S
2010-02-22	9	1.51	3	M	25.6	S
2010-02-22	9	1.51	3	M	11.6	E
2010-02-22	9	5.21	3	H	46.4	S
2010-02-22	9	5.21	3	H	32.3	S
2010-02-22	9	8.21	3	M	23.7	S
2010-02-22	9	8.22	3	M	30	S
2010-02-22	9	8.22	3	M	18.1	S
2010-02-22	9	8.23	3	M	45.3	S
2010-02-22	9	8.23	3	H	40.3	S
2010-02-22	9	8.23	3	M	33.4	S
2010-02-22	9	8.23	3	M	36.7	S
2010-02-22	9	8.23	3	H	35.3	S
2010-02-22	9	8.23	3	M	27.4	S
2010-02-22	9	8.23	3	M	23.2	S
2010-02-22	9	8.23	3	H	27.8	S
2010-06-15	9	1.1	3	H	17.2	S
2010-06-15	9	1.1	3	H	36.4	S
2010-06-15	9	8.3	3	M	39.7	S
2010-09-01	9	1.92	2	M	19.7	S
2010-09-01	9	1.92	2	M	21.8	S
2010-09-01	9	2.101	2	H	20.9	S
2010-09-01	9	2.101	2	M	18.7	E
2010-09-01	9	8.101	3	H	38.9	S
2010-09-01	9	8.101	3	H	24.8	S
2010-09-01	9	8.2	3	H	26.4	S
2010-09-01	9	10.1	3	M	15	S
2010-11-26	9	8.2	3	H	28.6	E
2010-11-26	9	10.1	3	U	35	S
2011-02-22	9	1.2	3	H	22.2	S
2011-02-22	9	2.101	3	H	18	S
2011-02-22	9	2.101	3	M	21	S
2011-02-22	9	2.101	3	M	18	S
2011-02-22	9	2.101	3	M	27	S
2011-05-23	9	1.2	3	H	15	S
2011-05-23	9	1.1	2	M	23.6	S
2011-05-23	9	2.101	3	M	22	E
2011-05-23	9	2.101	3	M	30	S
2011-05-23	9	2.101	3	M	29	S
2011-05-23	9	8.101	3	M	33.6	S
2011-05-23	9	8.101	3	H	27.3	S
2011-05-23	9	8.101	3	M	23.4	S
2011-09-23	9	5.3	2	M	19.1	S
2011-09-23	9	8.101	3	M	25.9	S
2011-09-23	9	8.101	3	H	33.4	S
2011-09-23	9	8.101	3	M	27.3	S
2011-09-23	9	8.41	2	M	21.8	S
2011-09-23	9	8.41	2	M	15.6	S
2012-01-11	9	2.101	3	M	15	E
2012-01-11	9	2.101	3	M	31.2	S
2012-01-11	9	2.101	3	M	17	E
2012-01-11	9	8.1	3	H	18	E
2012-04-19	9	2.1	3	M	18.9	S
2012-04-19	9	8.1	3	H	23	S
2009-11-13	10	9.1	2	H	14.4	S
2009-11-13	10	4.2	1	M	18	S
2009-11-13	10	2.2	2	M	12.9	S
2009-11-13	10	1.42	1	H	17.8	E
2009-11-13	10	1.23	1	U	10.4	E
2009-11-13	10	1.2	3	M	20	E
2010-02-24	10	3.2	3	M	19.6	S
2010-08-24	10	9.31	1	M	25.7	S
2010-08-24	10	4.91	2	M	12.7	E
2010-08-24	10	4.91	2	M	12	S
2010-11-25	10	2.72	2	M	12.5	S
2010-11-25	10	2.72	2	M	23	S
2010-11-25	10	2.72	2	H	31.6	S
2011-02-22	10	4.41	2	M	17	E
2011-02-22	10	4.41	2	U	9	S
2011-02-22	10	4.41	2	M	14	S
2011-02-22	10	4.41	2	M	18	S
2011-05-23	10	2.31	1	M	19.6	S
2011-05-23	10	3.9	1	M	12.9	S
2011-09-20	10	2.6	2	M	21.5	S
2011-09-20	10	2.1	1	M	13	S
2012-01-11	10	2.6	2	M	24.2	S
